# Supplementary material for: Comprehensive organic emission profiles for gasoline, diesel, and gas-turbine engines including intermediate and semi-volatile organic compound emissions
Source: Copernicus journal article supplement (doi:10.5194/acp-18-17637-2018), 2018-12-12
Supplement: Supplementary file 1 [file acp-18-17637-2018-supplement.zip]

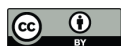

## *Supplement of*

# **Comprehensive organic emission profiles for gasoline, diesel, and gas-turbine engines including intermediate and semi-volatile organic compound emissions**

**Quanyang Lu et al.**

*Correspondence to:* Allen L. Robinson (alr@andrew.cmu.edu)

- [acp-18-17637-2018-supplement-title-page.pdf](#)
- [SI\\_Table\\_S3.xlsx](#)
- [SI\\_Table\\_S7.xlsx](#)
- [Supporting Information.pdf](#)

The copyright of individual parts of the supplement might differ from the CC BY 4.0 License.
