# Supplementary material for: Comprehensive organic emission profiles for gasoline, diesel, and gas-turbine engines including intermediate and semi-volatile organic compound emissions
Source: Copernicus journal article supplement (doi:10.5194/acp-18-17637-2018), 2018-12-12
Supplement: Supplementary file 2 [file acp-18-17637-2018-supplement.zip]

**Supporting information for “Comprehensive organic emission profiles for gasoline, diesel, and gas-turbine engines including intermediate and semi-volatile organic compound emissions”**

Quanyang Lu <sup>1, 2</sup>, Yunliang Zhao <sup>1, 2, 3</sup>, Allen L. Robinson <sup>1, 2 \*</sup>

<sup>1</sup>Department of Mechanical Engineering, Carnegie Mellon University, Pittsburgh, Pennsylvania 15213, United States

<sup>2</sup>Center for Atmospheric Particle Studies, Carnegie Mellon University, Pittsburgh, Pennsylvania 15213, United States

<sup>3</sup>Now at: California Air Resources Board, Sacramento, California 95814, United States

*Correspondence to:* Allen L. Robinson (alr@andrew.cmu.edu)

## **1. Comparison of three individual compounds measured using GC/MS analysis of Tedlar bag versus Tenax adsorbent samples**

Figure S2(a) shows that, the most volatile of these species, *n*-pentyl-benzene, the Tedlar bags measurement averaged 5.2 times the adsorbent tubes. We attribute this difference to incomplete collection of this relatively volatile species by the adsorbent tubes or incomplete recovery of thermal desorption method. Figure S2(b) show essentially the same amount of *n*-dodecane was measured using both approaches, a linear regression yields a slope of 0.85 and  $R^2$  of 0.9. As for naphthalene (the least volatile of these species), Figure S2(c) show the adsorbent tubes measured about 5 times more than the Tedlar bag, which we attribute to wall losses in the bag.<sup>54</sup>

## **2. Supplementing gas-turbine and diesel VOC speciation with traditional emission profiles**

Given the different levels of VOC characterization, we supplemented our gas-turbine and diesel VOC data with existing speciation profiles (SPECIATE profiles 4674 and 5565).

For gas turbine exhaust, 86 individual VOCs were identified, which can be classified as 21 SAPRC groups. Meanwhile, SPECIATE profile 5565 includes 81 individual species, which can be lumped into 27 groups (not including IVOCs in the profile). Of the two grouping results, 17 groups are identified in both profiles, and 10 groups are unique only in profile 5565.

We then complement our VOC results with 10 unique groups as additional 31.9% of VOC mass (all carbonyls, 31.9% of total VOC mass in profile 5565).

For diesel exhaust, 57 individual VOCs and 11 Kovats lumped groups were identified, which can be classified as 25 SAPRC groups. SPECIATE profile 4674 includes 144 individual species, which can be lumped into 34 groups (not including IVOCs in the profile). Of the two grouping results, 22 groups are identified in both profiles, and 12 groups are unique only in profile 4674.

We then complement our VOC results with 12 unique groups as additional 10.8% of VOC mass (10.8% of total VOC mass in profile 4674).

### **3. Preparing NMOG and POA emission profiles from VBS version**

The VBS version in Table S3(a) is designed to be applied to total organic emissions (NMOG + 1.2×OC). The VOC composition profiles in Table S3(b-f) is designed to be applied to VOC emissions. In most emission inventories, where NMOG and POA are provided separately, we recommend partition the VBS profiles into gas- and particle-phase sub-profiles for NMOG and POA emissions respectively, and then apply the VOC profiles in Table S3(b-f) to speciate VOC emissions.

## Supporting Tables

**Table S1 Summary of all tested engines, fuels and test cycles with complete characterization data**

| Source type | Category            | Class / Model | Number of engines | Number of tests | Model year | Fuel                                                             | Test cycle / Thrust                                                            |
|-------------|---------------------|---------------|-------------------|-----------------|------------|------------------------------------------------------------------|--------------------------------------------------------------------------------|
| Gasoline    | LDGVs (on-road)     | Pre-LEV       | 10                | 10              | 1987-1999  | Commercial summertime California gasoline                        | Cold-start unified cycle (UC) / Hot-start                                      |
|             |                     | LEV           | 9                 | 10              | 1991-2009  |                                                                  |                                                                                |
|             |                     | ULEV          | 10                | 12              | 2003-2012  |                                                                  |                                                                                |
|             | SOREs (off-road)    | SORE-2S       | 2                 | 3               | 2002, 2005 |                                                                  | CARB SORE certification cycle                                                  |
|             |                     | SORE-4S       | 2                 | 3               | 2004, 2005 |                                                                  |                                                                                |
| Gas-turbine | KC-135 Stratotanker | CFM56-2B1     | 1                 | 2               | /          | Commercial JP-8                                                  | 4% and 85%                                                                     |
| Diesel      | HDDVs (on-road)     | DPF-equipped  | 2                 | 8               | 2007, 2010 | Three different ULSD fuels with varying aromatic content (9-28%) | Urban Dynamometer Driving Schedule (UDDS) / Creep and idle / High-speed cruise |
|             |                     | Non-DPF       | 1                 | 10              | 2006       |                                                                  |                                                                                |
|             | MDDV (on-road)      | Non-DPF       | 1                 | 1               | 2005       | Commercial California ultra-low sulfur diesel (ULSD)             | Cold-start UC                                                                  |
|             | TRU (off-road)      | Non-DPF       | 1                 | 2               | 1998       |                                                                  | CARB procedures for engine certification                                       |

**Table S2 Effect of temperature on gas/particle partitioning at equilibrium**

| Log (C*, T = 298K) | C* (ug/m <sup>3</sup> ) |          |          | Particle-phase fraction (X <sub>p</sub> ) |          |        | $\Delta H_{\text{vap}}$<br>(kJ /<br>mol) |
|--------------------|-------------------------|----------|----------|-------------------------------------------|----------|--------|------------------------------------------|
|                    | T = 298K                | T = 273K | T = 320K | T = 298K                                  | T = 273K | T=320K |                                          |
| Nonvolatile        | n/a                     | n/a      | n/a      | 1.00                                      | 1.00     | 1.00   | n/a                                      |
| -1                 | 1.00E-01                | 3.14E-03 | 1.34E+00 | 0.99                                      | 1.00     | 0.88   | 96                                       |
| 0                  | 1.00E+00                | 4.72E-02 | 9.85E+00 | 0.91                                      | 1.00     | 0.50   | 85                                       |
| 1                  | 1.00E+01                | 7.08E-01 | 7.26E+01 | 0.50                                      | 0.93     | 0.12   | 74                                       |
| 2                  | 1.00E+02                | 1.06E+01 | 5.35E+02 | 0.09                                      | 0.48     | 0.02   | 63                                       |
| 3                  | 1.00E+03                | 1.60E+02 | 3.94E+03 | 0.01                                      | 0.06     | 0.00   | 52                                       |
| 4                  | 1.00E+04                | 2.40E+03 | 2.91E+04 | 0.00                                      | 0.00     | 0.00   | 41                                       |
| 5                  | 1.00E+05                | 3.60E+04 | 2.14E+05 | 0.00                                      | 0.00     | 0.00   | 30                                       |
| 6                  | 1.00E+06                | 5.41E+05 | 1.58E+06 | 0.00                                      | 0.00     | 0.00   | 19                                       |

**Table S4 Speciated IVOCs and their OH reaction rate constants (cm<sup>3</sup> molec<sup>-1</sup> s<sup>-1</sup>) and SOA yields at the OA concentration of 9 µg/m<sup>3</sup> from Zhao et al. (2016)**

| <b>Compound code</b> | <b>Compound name</b>        | <b>OH reaction rate</b> | <b>SOA yield</b> |
|----------------------|-----------------------------|-------------------------|------------------|
| 1                    | Dodecane                    | 1.32E-11                | 0.08             |
| 2                    | Tridecane                   | 1.51E-11                | 0.21             |
| 3                    | Tetradecane                 | 1.68E-11                | 0.28             |
| 4                    | Pentadecane                 | 1.82E-11                | 0.34             |
| 5                    | Hexadecaen                  | 1.96E-11                | 0.38             |
| 6                    | Heptadecane                 | 2.10E-11                | 0.42             |
| 7                    | Octadecane                  | 2.24E-11                | 0.42             |
| 8                    | Nonadecane                  | 2.38E-11                | 0.42             |
| 9                    | Eicosane                    | 2.52E-11                | 0.42             |
| 10                   | Heneicosane                 | 2.67E-11                | 0.42             |
| 11                   | Docosane                    | 2.81E-11                | 0.42             |
| 12                   | 2,6,10-Trimethylundecane    | 1.70E-11                | 0.04             |
| 13                   | 2,6,10-Trimethyldodecane    | 1.87E-11                | 0.08             |
| 14                   | 2,6,10-Trimethyltridecane   | 2.01E-11                | 0.21             |
| 15                   | 2,6,10-Trimethylpentadecane | 2.30E-11                | 0.34             |
| 16                   | Pristane                    | 2.44E-11                | 0.34             |
| 17                   | Phytane                     | 2.61E-11                | 0.38             |
| 18                   | Hexylcyclohexane            | 1.76E-11                | 0.08             |
| 19                   | Heptylcyclohexane           | 1.91E-11                | 0.21             |
| 20                   | Octylcyclohexane            | 2.05E-11                | 0.28             |
| 21                   | Nonylcyclohexane            | 2.19E-11                | 0.34             |
| 22                   | Decylcyclohexane            | 2.33E-11                | 0.38             |
| 23                   | Undecylcyclohexane          | 2.47E-11                | 0.42             |
| 24                   | Dodecylcyclohexane          | 2.61E-11                | 0.42             |
| 25                   | Tridecylcyclohexane         | 2.75E-11                | 0.42             |
| 26                   | Tetradecylcyclohexane       | 2.89E-11                | 0.42             |
| 27                   | Pentadecylcyclohexane       | 3.04E-11                | 0.42             |
| 28                   | Hexadecylcyclohexane        | 3.18E-11                | 0.42             |
| 29                   | Heptadecylcyclohexane       | 3.32E-11                | 0.42             |
| 30                   | Naphthalene                 | 2.30E-11                | 0.21             |
| 31                   | 2-methylnaphthalene         | 4.86E-11                | 0.30             |
| 32                   | 1-methylnaphthalene         | 4.09E-11                | 0.25             |
| 33                   | C2-naphthalene              | 6.00E-11                | 0.31             |
| 34                   | C3-naphthalene              | 8.00E-11                | 0.31             |

| <b>Compound code</b> | <b>Compound name</b>       | <b>OH reaction rate</b> | <b>SOA yield</b> |
|----------------------|----------------------------|-------------------------|------------------|
| 35                   | C4-naphthalene             | 8.00E-11                | 0.31             |
| 36                   | Acenaphthylene             | 1.24E-10                | 0.31             |
| 37                   | Acenaphthene               | 8.00E-11                | 0.31             |
| 38                   | Fluorene                   | 1.60E-11                | 0.31             |
| 39                   | C1-Fluorene                | 8.00E-11                | 0.31             |
| 40                   | Phenanthrene               | 3.20E-11                | 0.31             |
| 41                   | Anthracene                 | 1.78E-10                | 0.31             |
| 42                   | C1-Phenanthrene/anthracene | 5.89E-11                | 0.31             |
| 43                   | C2-Phenanthrene/anthracene | 8.00E-11                | 0.31             |
| 44                   | Fluoranthene               | 3.30E-11                | 0.31             |
| 45                   | Pyrene                     | 5.60E-11                | 0.31             |
| 46                   | C1-Fluoranthene/pyrene     | 1.31E-10                | 0.31             |
| 47                   | Pentylbenzene              | 1.01E-11                | 0.04             |
| 48                   | Hexylbenzene               | 1.15E-11                | 0.08             |
| 49                   | Heptylbenzene              | 1.30E-11                | 0.21             |
| 50                   | Octylbenzene               | 1.44E-11                | 0.28             |
| 51                   | Nonylbenzene               | 1.58E-11                | 0.34             |
| 52                   | Decylbenzene               | 1.72E-11                | 0.38             |
| 53                   | Undecylbenzene             | 1.86E-11                | 0.42             |
| 54                   | Dodecylbenzene             | 2.00E-11                | 0.42             |
| 55                   | Tridecylbenzene            | 2.14E-11                | 0.42             |
| 56                   | Tetradecylbenzene          | 2.29E-11                | 0.42             |
| 57                   | Pentadecylbenzene          | 2.43E-11                | 0.42             |

**Table S5a Surrogate compounds (*n*-alkanes) for OH reaction rate constants ( $\text{cm}^3 \text{ molec}^{-1} \text{ s}^{-1}$ ) and SOA yields of unspciated IVOC bins under the IVOC-cyclic case from Zhao et al. (2016)**

| Bin# | OH rate constant | Surrogate compounds for SOA yields |                                           |
|------|------------------|------------------------------------|-------------------------------------------|
|      |                  | Unspciated <i>b</i> -alkanes       | Unspciated cyclic compounds (IVOC-cyclic) |
| B12  | C12              | C10                                | C12                                       |
| B13  | C13              | C11                                | C13                                       |
| B14  | C14              | C12                                | C14                                       |
| B15  | C15              | C13                                | C15                                       |
| B16  | C16              | C14                                | C16                                       |
| B17  | C17              | C15                                | C17                                       |
| B18  | C18              | C16                                | C18                                       |
| B19  | C19              | C17                                | C19                                       |
| B20  | C20              | C18                                | C20                                       |
| B21  | C21              | C19                                | C21                                       |
| B22  | C22              | C20                                | C22                                       |

**Table S5b Surrogate compounds (*n*-alkanes and naphthalenes) for OH reaction rate constants ( $\text{cm}^3 \text{ molec}^{-1} \text{ s}^{-1}$ ) and SOA yields of unspciated cyclic compounds in each IVOC bin under the IVOC-aromatics case from Zhao et al. (2016)**

| Bin# | OH rate constant | Unspciated cyclic compounds (IVOC-aromatic) |
|------|------------------|---------------------------------------------|
| B12  | Naphthalene      | Naphthalene                                 |
| B13  | C1-naphthalene   | 2-Methylnaphthalene                         |
| B14  | C2-naphthalene   | 1,2-Dimethylnaphthalene                     |
| B15  | C3-naphthalene   | C15                                         |
| B16  | C4-naphthalene   | C16                                         |
| B17  | C17              | C17                                         |
| B18  | C18              | C18                                         |
| B19  | C19              | C19                                         |



B20

C20

C20

B21

C21

C21

B22

C22

C22

---

**Table S6 Comparison of different estimates of IVOC fraction and overall SOA yield of NMOG emissions**

|                    | IVOC mass fraction |             |        | SOA yield |             |        |
|--------------------|--------------------|-------------|--------|-----------|-------------|--------|
|                    | Gasoline           | Gas-turbine | Diesel | Gasoline  | Gas-turbine | Diesel |
| <b>This work</b>   | 4.6%               | 27.9%       | 54.3%  | 0.041     | 0.086       | 0.190  |
| <b>Traditional</b> | /                  | /           | /      | 0.022     | 0.008       | 0.009  |
| <b>ROB</b>         | 1.2%               | 6.1%        | 8.0%   | 0.023     | 0.018       | 0.021  |
| <b>MUR</b>         | 7.5%               | 39.5%       | 51.7%  | N/A       | N/A         | N/A    |
| <b>PYE</b>         | 19.9%              | 22.3%       | 6.9%   | 0.065     | 0.057       | 0.024  |
| <b>GEN</b>         | 1%                 | N/A         | 62%    | 0.023     | N/A         | 0.154  |
| <b>JAT</b>         | 25%                | N/A         | 20%    | 0.071     | N/A         | 0.077  |

## Supporting Figures

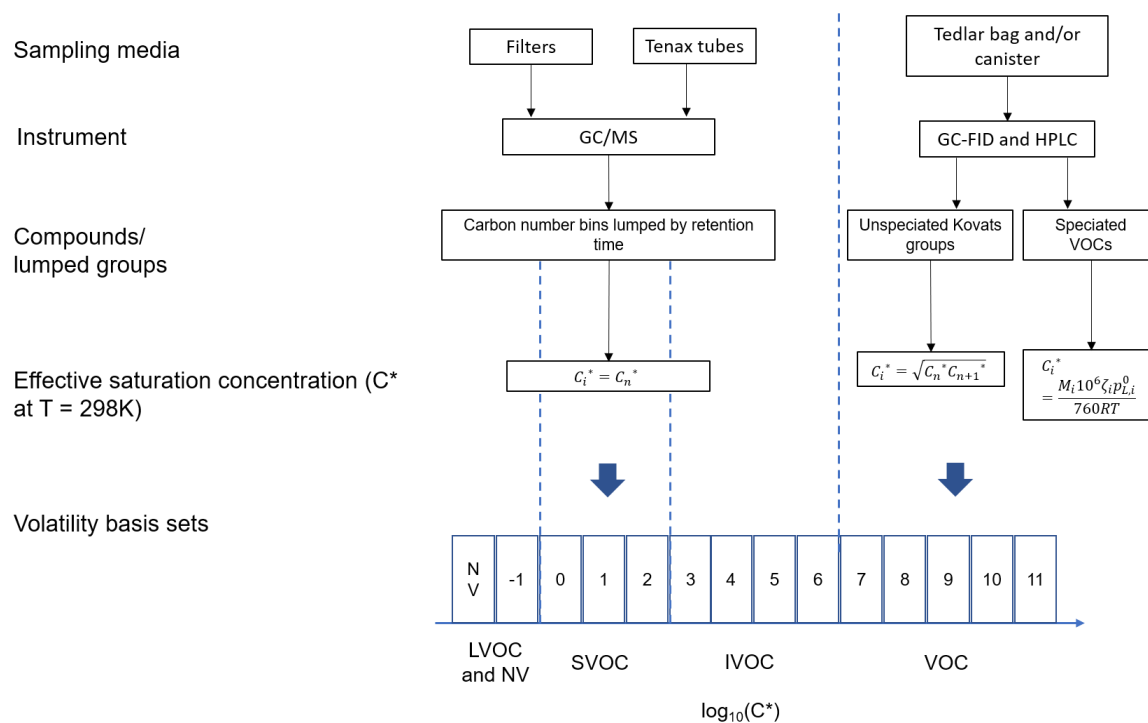

**Figure S1 Schematic diagram of mapping speciated and unspeciated compounds data to volatility basis set (VBS),  $C_n^*$  denotes the  $C^*$  value for n-alkanes as surrogate.**

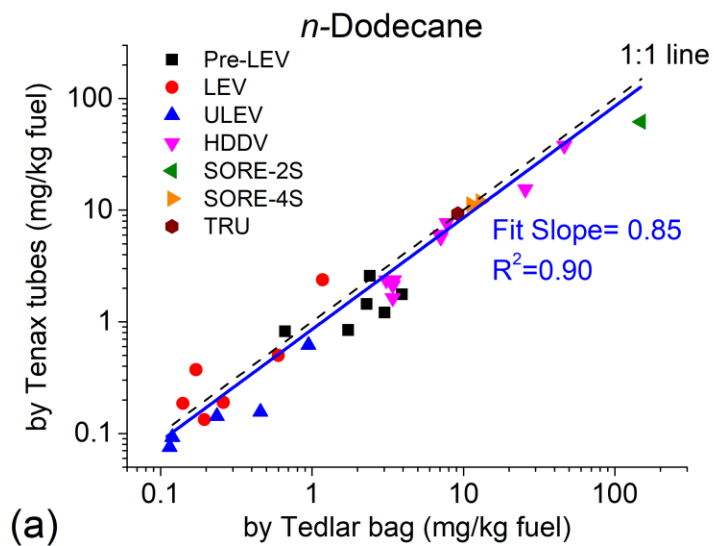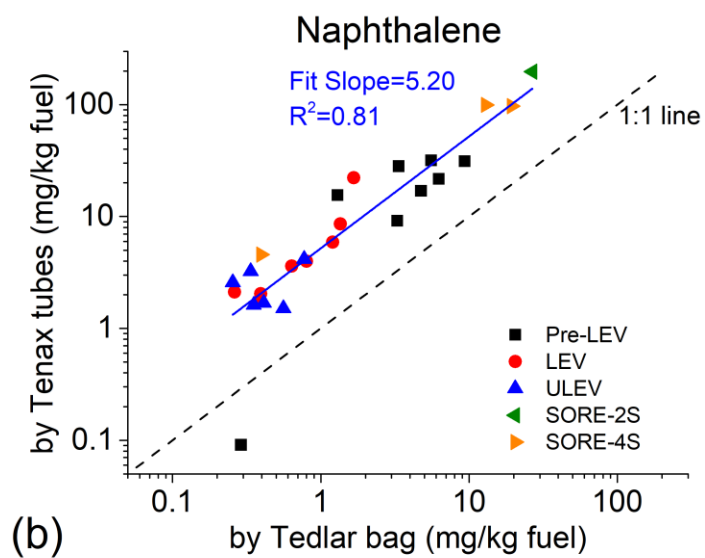

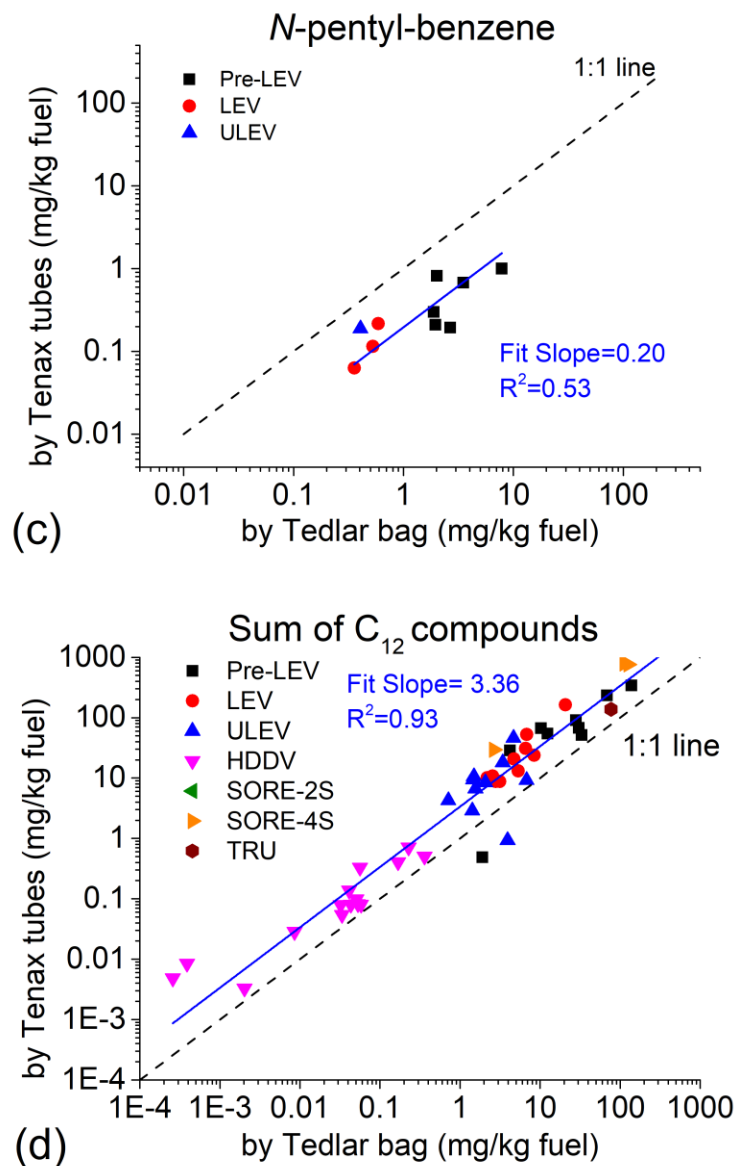

**Figure S2 Comparison of (a) *n*-dodecane (b) naphthalene (c) *n*-pentyl-benzene (d) sum of all C<sub>12</sub> compounds results measured using GC/MS analysis of Tedlar bag versus Tenax adsorbent samples (everything elutes in the C<sub>12</sub> carbon number bin), demonstrating the consistency of two technique in *n*-dodecane measurement**

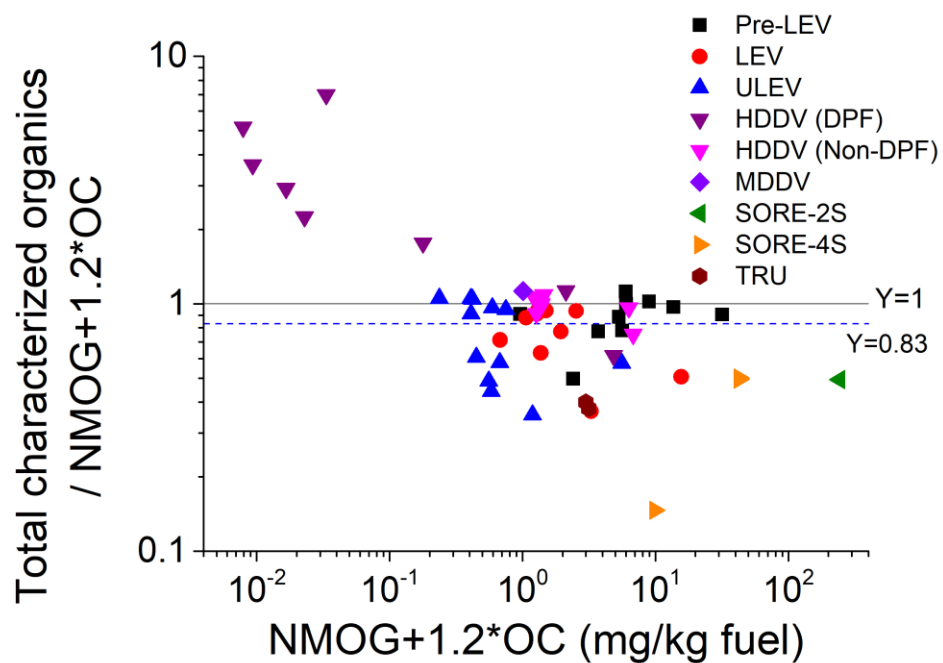

**Figure S3 Ratio of total characterized organics integrated from all techniques to total organics by bulk measurement (NMOG+1.2\*OC), indicating mass closure for on-road non-DPF diesel source and partial mass closure (0.83) for on-road gasoline sources**

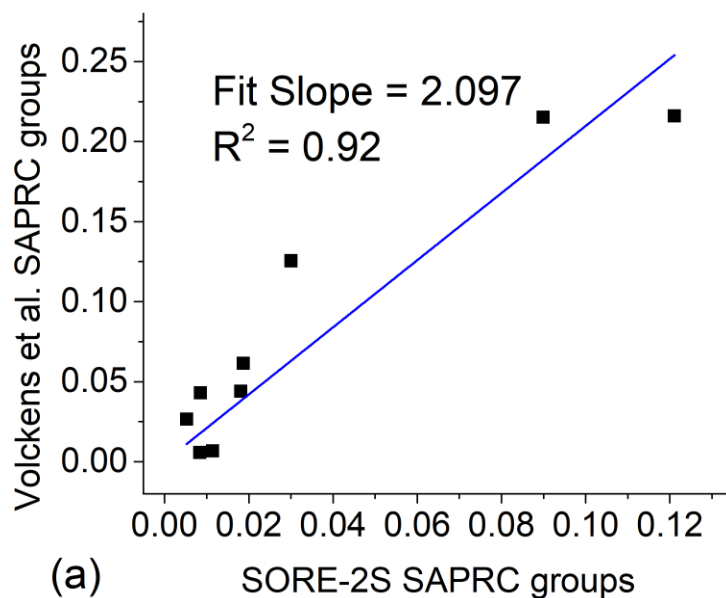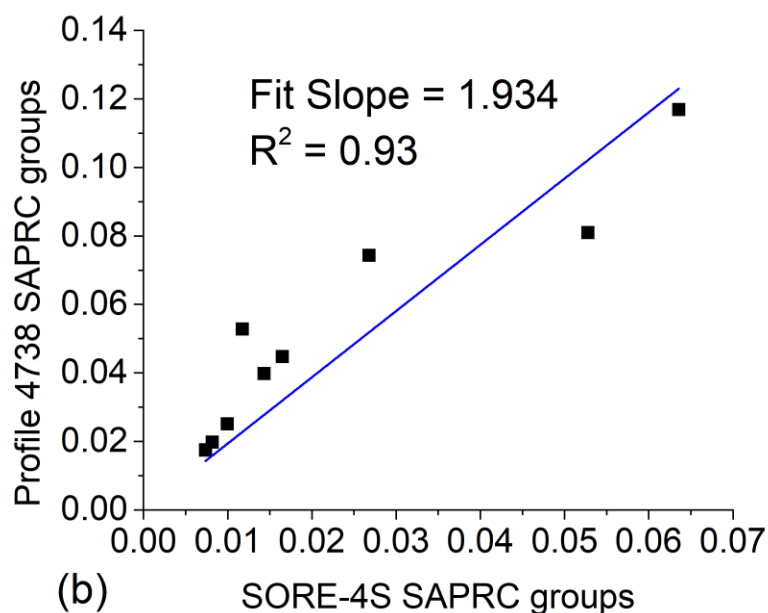

**Figure S4 Scatter plot of SOA-forming SAPRC groups (ALK4, ALK5, ARO1, ARO2, BENZ, TOLU, PXYL, MXYL, OXYL, B124) mass fraction in NMOG emission versus literature value for (a) SORE-2S (b) SORE-4S, indicating the need to factorize VOC mass in off-road measurement results by 2**

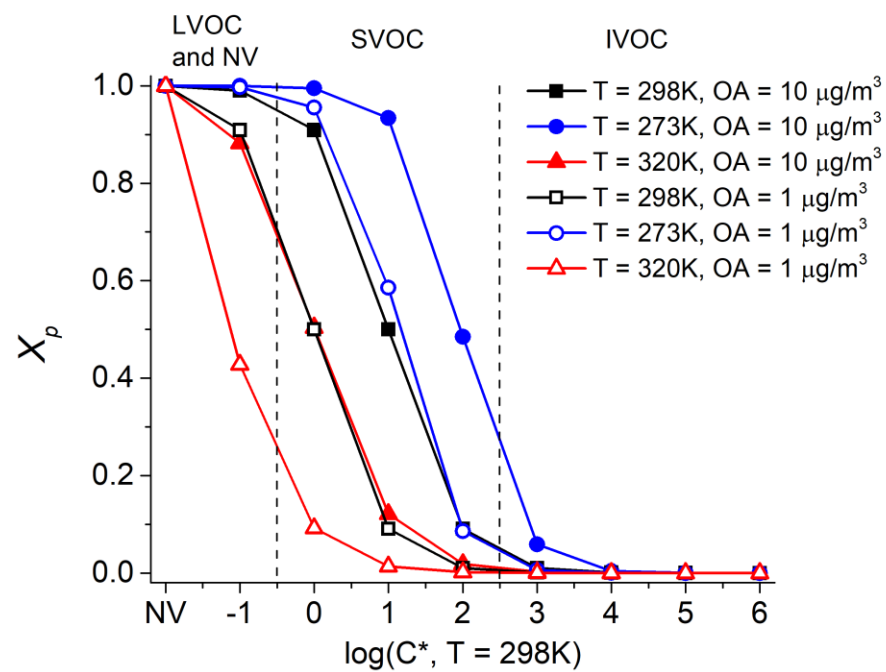

**Figure S5 Effect of temperature and OA loading on gas/particle partitioning at equilibrium**



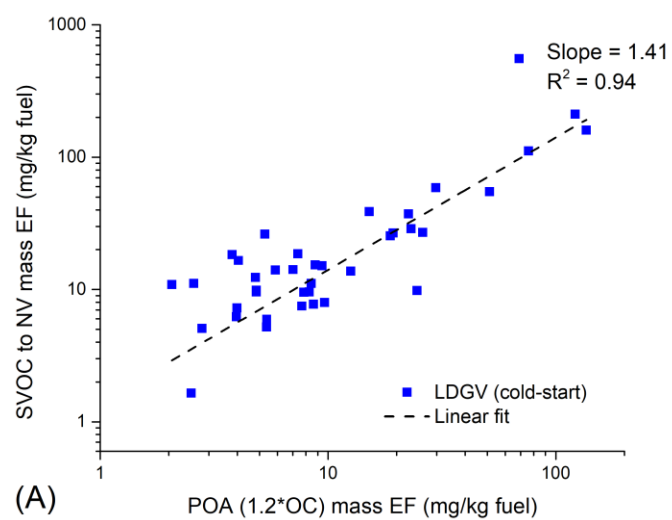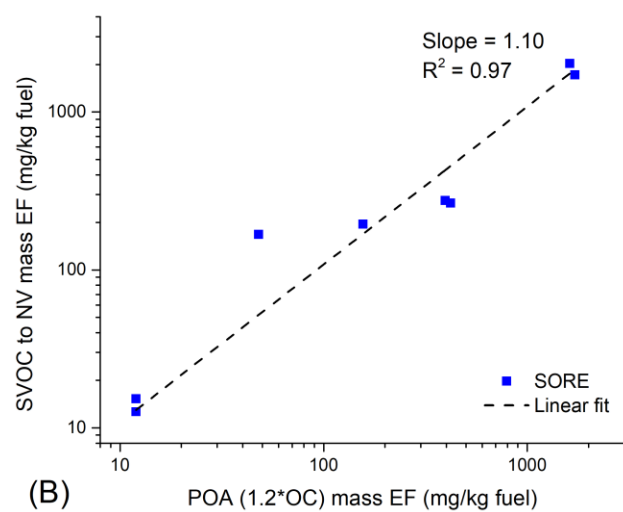

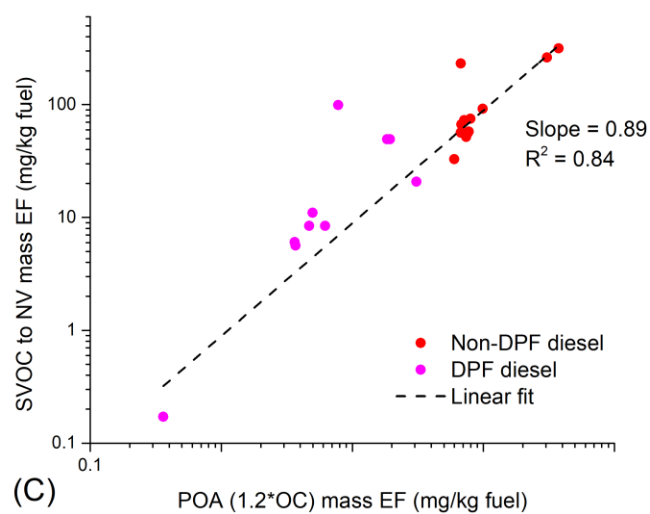

**Figure S6 Scatter plot of sum of SVOC to NV mass versus filter-based POA measurements**

**(A: On-road gasoline, cold-start B: off-road gasoline, C: non-DPF and DPF diesel)**

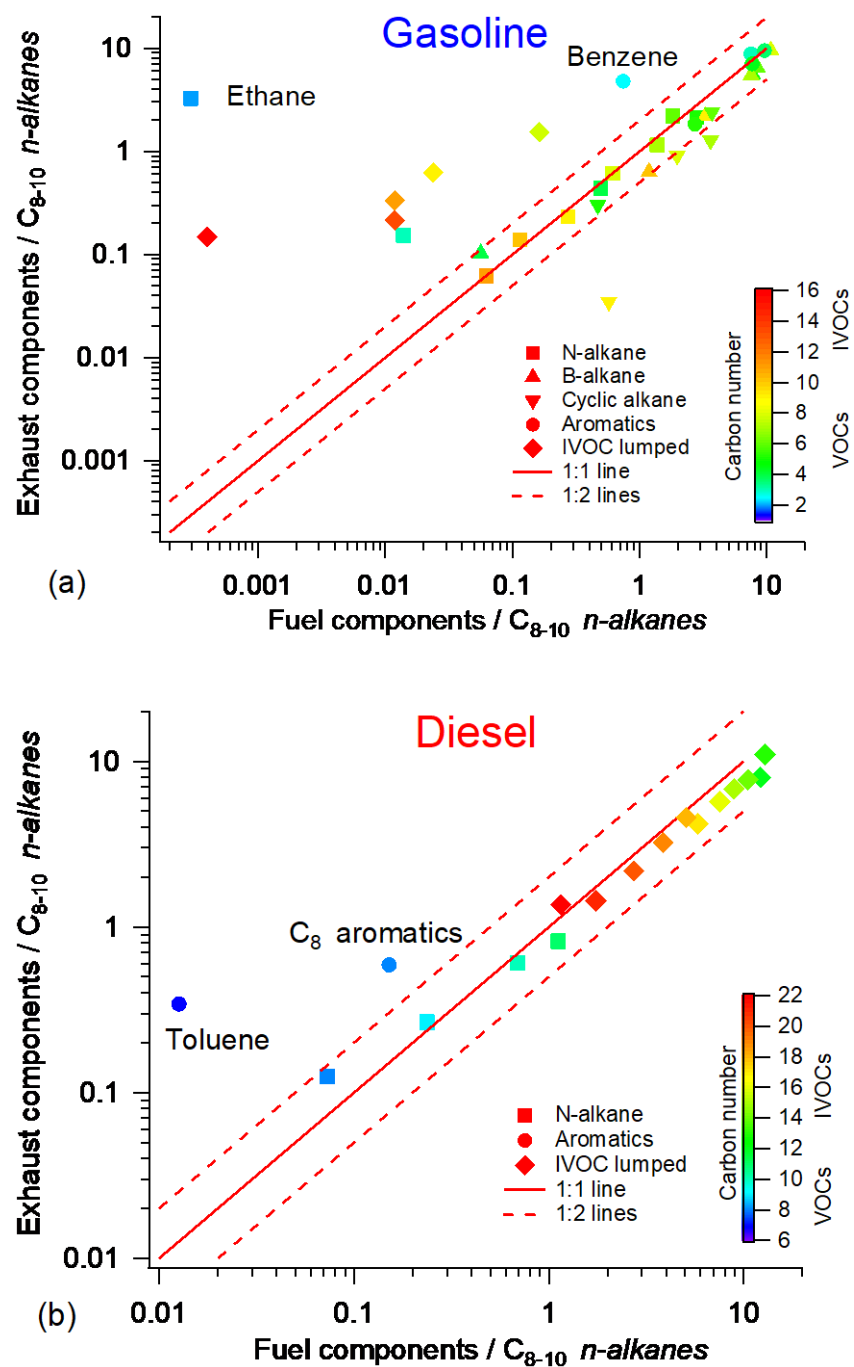

**Figure S7** Scatter plot of exhaust components versus fuel (VOCs and IVOCs) normalized by  $C_{8-10}$  *n*-alkanes for (a) Gasoline (b) Diesel sources, demonstrating the overall consistency of chemical composition between exhaust and fuel

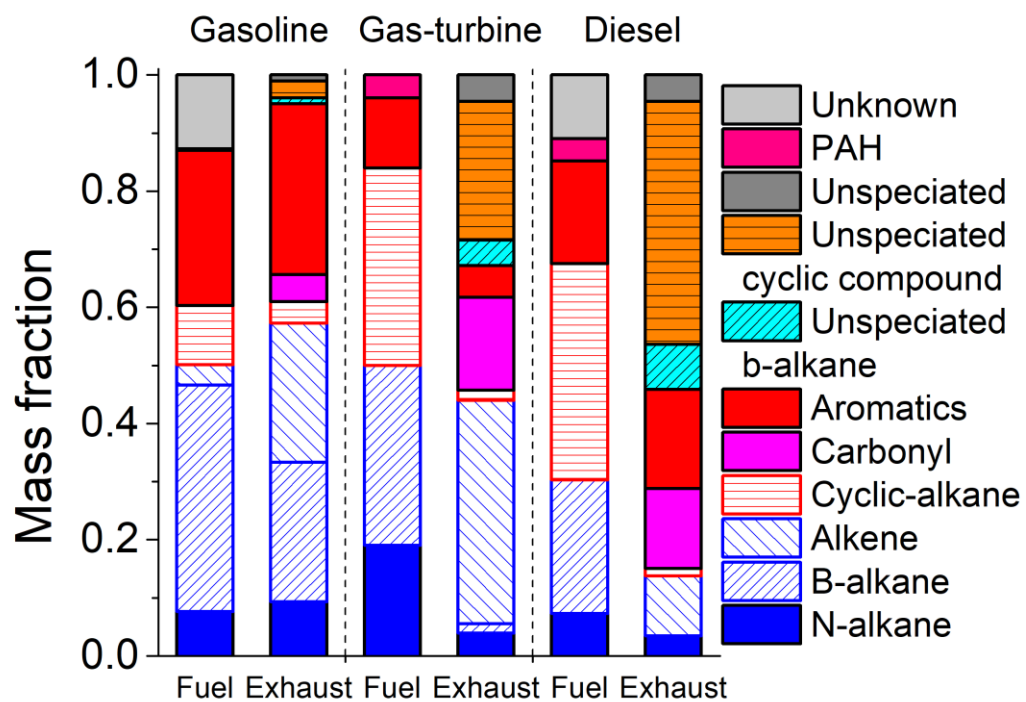

**Figure S8 Comparison of median chemical composition between fuel and exhaust for gasoline, gas-turbine and diesel sources, indicating the compositional changes after combustion**

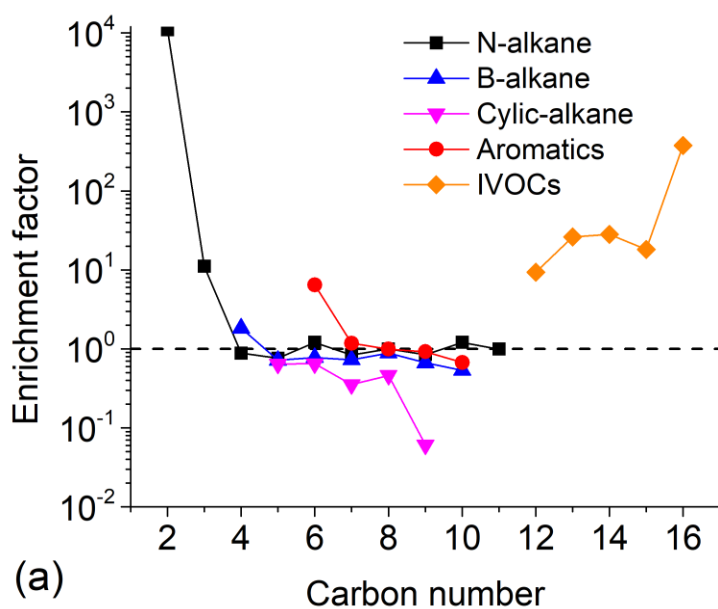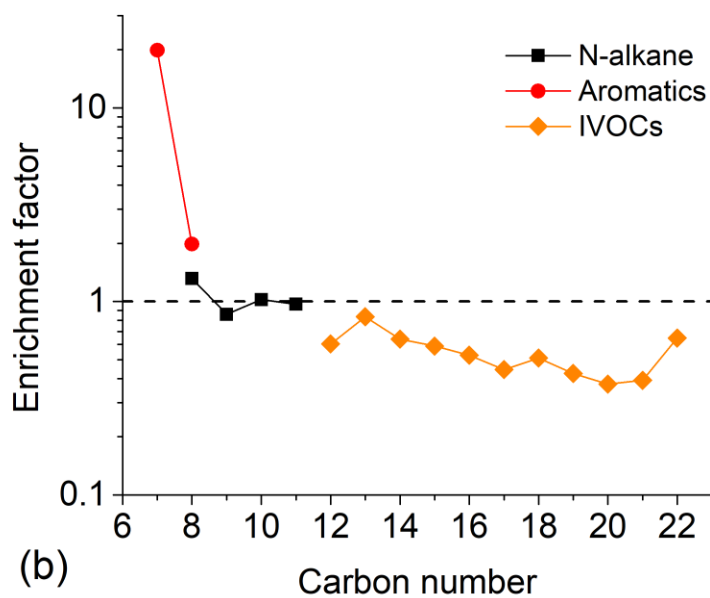

**Figure S9 Enrichment factors of exhaust and fuel components (VOCs and IVOCs) normalized by C<sub>8-10</sub> *n*-alkanes (a) Gasoline (cold-start) (b) non-DPF diesel, demonstrating the enrichment for certain compounds (VOCs and/or IVOCs) in difference sources**

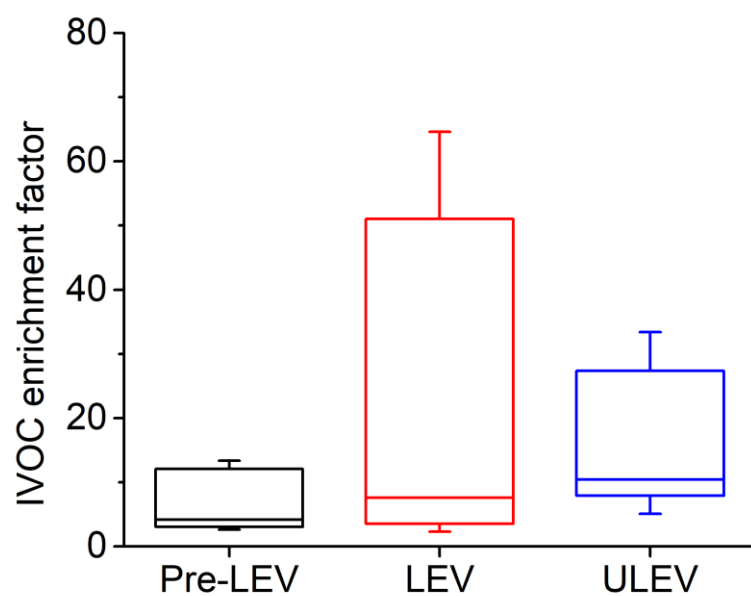

**Figure S10 IVOC enrichment factors of Pre-LEV, LEV and ULEV vehicles exhaust**

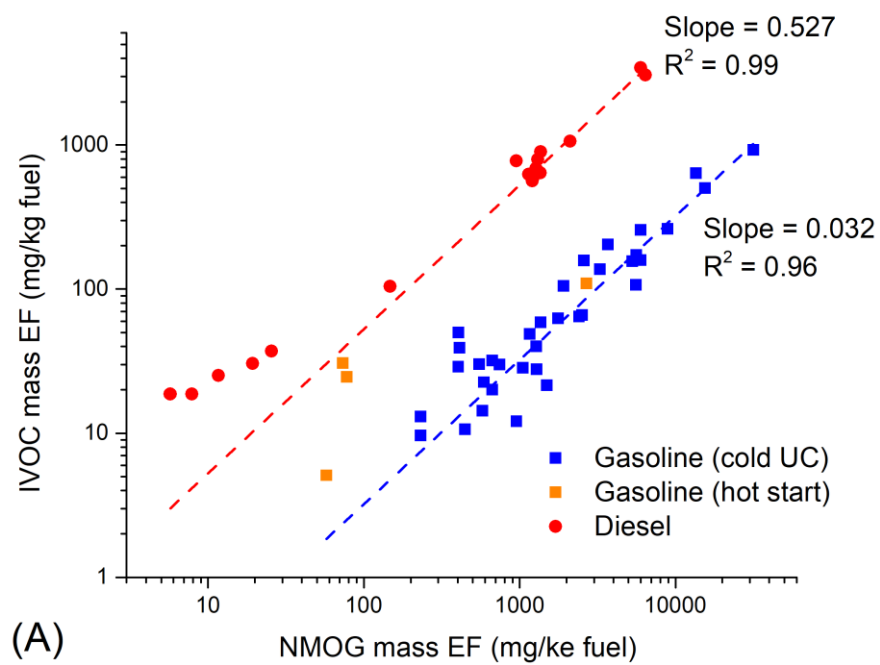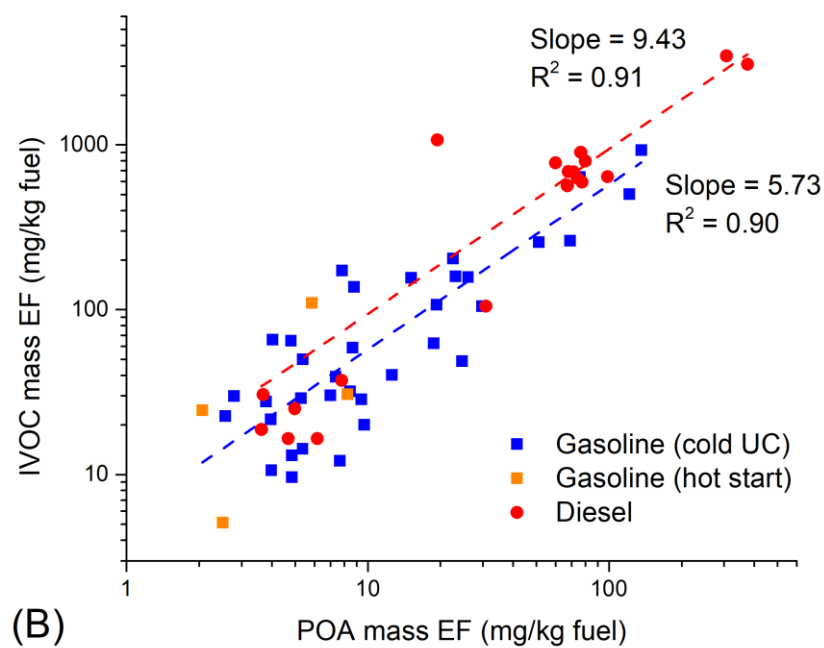

**Figure S11 Comparison of the ratios and coefficients of determination,  $R^2$  between (a) IVOC and NMOG and (b) IVOC and POA for tested gasoline and diesel sources**

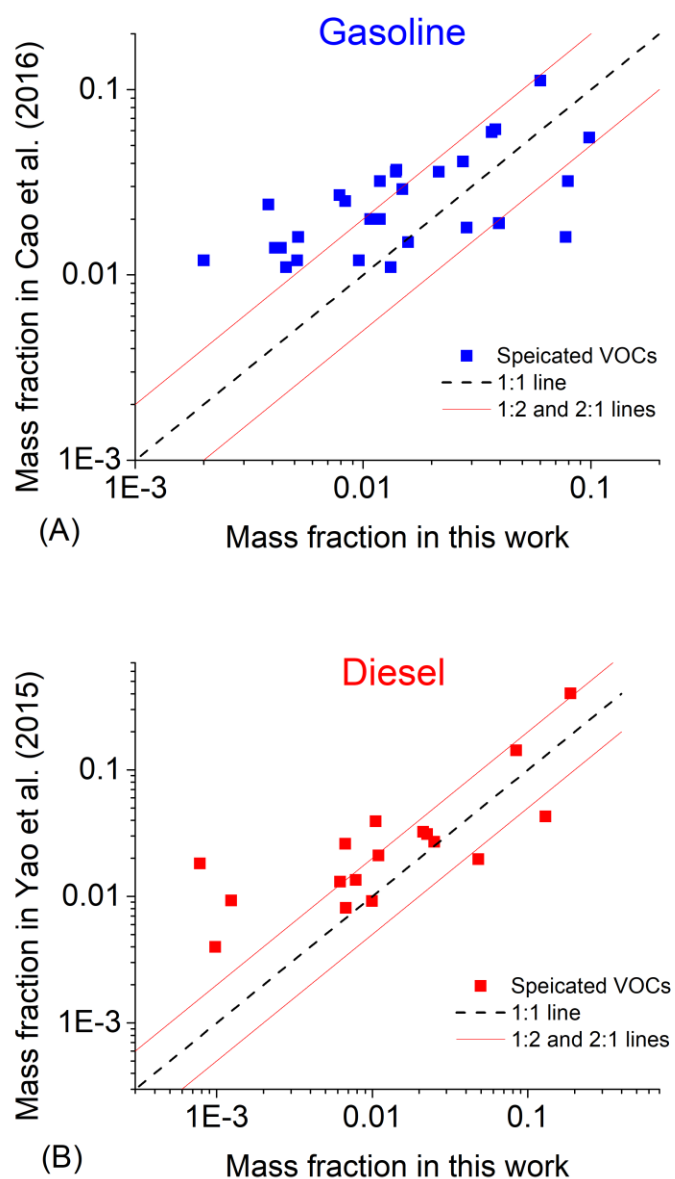

**Figure S12 Scatter plots of mass fractions of speciated VOCs in new VOC emission profiles versus: on-road gasoline (left) and on-road diesel (right) vehicle VOC emissions in China**
