# Supplementary material for: Comprehensive organic emission profiles for gasoline, diesel, and gas-turbine engines including intermediate and semi-volatile organic compound emissions
Source: Copernicus journal article supplement (doi:10.5194/acp-18-17637-2018), 2018-12-12
Supplement: Supplementary file 3 [file acp-18-17637-2018-supplement.zip]

Archive with 4 entries (4 files):
- SI_Table_S3.xlsx
- SI_Table_S7.xlsx
- Supporting Information.pdf
- acp-18-17637-2018-supplement-title-page.pdf
