# Supplementary material for: Comprehensive organic emission profiles for gasoline, diesel, and gas-turbine engines including intermediate and semi-volatile organic compound emissions
Source: Copernicus journal article supplement (doi:10.5194/acp-18-17637-2018), 2018-12-12
Supplement: Supplementary file 3 [file acp-18-17637-2018-supplement.zip › SI_Table_S3.xlsx]

## Sheet: Table S3a
VBS distribution of complete profiles
	Gasoline (cold-start)	Gasoline (hot operation)	Gas-turbine	Diesel (non-DPF)	Diesel (DPF)
NV	0.00164859	0.00647105	0.00109533	0.00601092	0.00611919
log C* = -1	0.000457788	0.0115875	0.00521178	0.00413768	0.000664295
log C* = 0	0.000994679	0.00431354	0.01101	0.00532027	0.00111138
log C* = 1	0.00475479	0.0238543	0.0162551	0.0156113	0.0828686
log C* = 2	0.00507945	0.0189331	0.00879728	0.0175039	0.0378944
log C* = 3	0.00312775	0.0191644	0.00858622	0.0522005	0.0319715
log C* = 4	0.00332343	0.0221947	0.0195348	0.133744	0.0799138
log C* = 5	0.00781435	0.0346745	0.0462125	0.17813	0.175875
log C* = 6	0.0312743	0.105182	0.198147	0.177485	0.167518
log C* = 7	0.0840523	0.0722414	0.0349579	0.0879883	0.0731863
log C* = 8	0.292652	0.241795	0.0776884	0.0504224	0.0244102
log C* = 9	0.30224	0.273485	0.132911	0.0981139	0.266794
log C* = 10	0.117242	0.0773634	0.209386	0.115993	0.0378525
log C* = 11	0.145339	0.0887395	0.230207	0.0573389	0.013821

## Sheet: Table S3b
VOC emission composition for gasoline source (cold-start)
CAS	Name	Mass fraction
50-00-0	formaldehyde	0.0984487
75-07-0	acetaldehyde	0.0794532
74-85-1	ethene	0.077569
108-88-3	toluene	0.0601372
115-07-1	propene	0.039524
78-78-4	2-methyl-butane	0.038157
71-43-2	benzene	0.0366966
540-84-1	2,2,4-trimethyl-pentane	0.0331618
74-84-0	ethane	0.0285066
108-38-3	m-xylene	0.0274854
107-83-5	2-methyl-pentane	0.021538
74-86-2	ethyne	0.0185961
95-63-6	1,2,4-trimethyl-benzene	0.0171612
67-64-1	acetone	0.0157875
95-47-6	o-xylene	0.0155095
110-54-3	n-hexane	0.0148716
565-59-3	2,3-dimethyl-pentane	0.0145217
106-42-3	p-xylene	0.0140179
109-66-0	n-pentane	0.0140049
96-14-0	3-methyl-pentane	0.013935
115-11-7	2-methyl-propene	0.0135763
100-52-7	benzaldehyde	0.0132336
96-37-7	methylcyclo-pentane	0.0118704
100-41-4	ethyl-benzene	0.0118683
589-34-4	3-methyl-hexane	0.0108876
620-14-4	1-methyl-3-ethyl-benzene	0.0108589
591-76-4	2-methyl-hexane	0.0107403
74-98-6	propane	0.00957524
108-08-7	2,4-dimethyl-pentane	0.00947811
107-02-8	acrolein	0.00834555
142-82-5	n-heptane	0.00787665
565-75-3	2,3,4-trimethyl-pentane	0.00777015
79-29-8	2,3-dimethyl-butane	0.0074243
106-98-9	1-butene	0.00654397
106-97-8	n-butane	0.00610869
108-67-8	1,3,5-trimethyl-benzene	0.00579216
78-85-3	methacrolein	0.00549147
106-99-0	1,3-butadiene	0.00541288
589-43-5	2,4-dimethyl-hexane	0.0053816
622-96-8	1-methyl-4-ethyl-benzene	0.00520656
123-38-6	propanal	0.00519164
589-81-1	3-methyl-heptane	0.00513135
3522-94-9	2,2,5-trimethyl-hexane	0.00504183
592-27-8	2-methyl-heptane	0.00458796
611-14-3	1-methyl-2-ethyl-benzene	0.00435807
592-13-2	2,5-dimethyl-hexane	0.00425689
108-87-2	methylcyclo-hexane	0.00410193
111-65-9	n-octane	0.00406272
110-82-7	cyclo-hexane	0.00391361
526-73-8	1,2,3-trimethyl-benzene	0.00384096
624-64-6	trans-2-butene	0.00352575
871-83-0	2-methyl-nonane	0.00324077
584-94-1	2,3-dimethyl-hexane	0.00308465
75-83-2	2,2-dimethyl-butane	0.00302696
590-18-1	cis-2-butene	0.0029155
2216-34-4	4-methyl-octane	0.00271162
513-35-9	2-methyl-2-butene	0.00271136
78-93-3	methylethyl-ketone	0.00255223
1759-58-6	trans-1,3-dimethyl-cyclopentane	0.00245383
934-74-7	1,3-dimethyl-5-ethyl-benzene	0.00241612
2216-33-3	3-methyl-octane	0.00238188
563-46-2	2-methyl-1-butene	0.00226931
103-65-1	n-propyl-benzene	0.00216013
4170-30-3	crotonaldehyde	0.00211114
123-72-8	butanal	0.00199658
287-92-3	cyclo-pentane	0.00191657
463-49-0	1,2-propadiene	0.00186132
589-53-7	4-methyl-heptane	0.00176866
496-11-7	2,3-dihydro-indene	0.00172476
100-42-5	styrene	0.00169368
646-04-8	trans-2-pentene	0.00165737
111-84-2	n-nonane	0.00163303
617-78-7	3-ethylpentane	0.00159796
638-04-0	cis-1,3-dimethyl-cyclohexane	0.00155688
74-99-7	1-propyne	0.0014904
2532-58-3	cis-1,3-dimethyl-cyclopentane	0.0014814
1074-43-7	1-methyl-3-n-propyl-benzene	0.00144506
66-25-1	hexanal	0.00134899
110-83-8	cyclo-hexene	0.00134801
926-82-9	3,5-dimethyl-heptane	0.00130608
124-18-5	n-decane	0.00126144
75-28-5	methyl-propane	0.00110057
109-67-1	1-pentene	0.00108702
2815-58-9	1,2,4-trimethyl-cyclopentane	0.00106447
922-62-3	3-methyl-cis-2-pentene	0.00105455
1758-88-9	1,4-dimethyl-2-ethyl-benzene	0.00105289
527-53-7	1,2,3,5-tetramethyl-benzene	0.00103961
822-50-4	trans-1,2-dimethyl-cyclopentane	0.00102954
2613-66-3	cis-1-methyl-3-ethyl-cyclopentane	0.00101364
874-41-9	1,3-dimethyl-4-ethyl-benzene	0.00096792
627-20-3	cis-2-pentene	0.00090946
934-80-5	1,2-dimethyl-4-ethyl-benzene	0.000905253
933-98-2	1,2-dimethyl-3-ethyl-benzene	0.000897434
625-65-0	2,4-dimethyl-2-pentene	0.000872819
2207-03-6	trans-1,3-dimethyl-cyclohexane	0.000839409
583-48-2	3,4-dimethyl-hexane	0.000825466
142-29-0	cyclo-pentene	0.000816028
95-93-2	1,2,4,5-tetramethyl-benzene	0.000715707
563-45-1	3-methyl-1-butene	0.000696766
590-35-2	2,2-dimethyl-pentane	0.000651296
1074-55-1	1-methyl-4-n-propyl-benzene	0.000619922
141-93-5	1,3-diethyl-benzene	0.000607649
562-49-2	3,3-dimethyl-pentane	0.000602954
1069-53-0	2,3,5-trimethyl-hexane	0.000578116
20291-95-6	2,2,5-trimethyl-heptane	0.000577085
4032-94-4	2,4-dimethyl-octane	0.000566084
2207-04-7	trans-1,4-dimethyl-cyclohexane	0.000556876
527-84-4	1-methyl-2-(1-methylethyl) benzene	0.000526823
98-82-8	(1-methylethyl) benzene	0.000516953
1074-17-5	1-methyl-2-n-propyl-benzene	0.000516353
2815-57-8	(1a,2a,3b)-1,2,3-trimethyl-cyclopentane	0.000504966
2613-65-2	trans-1-methyl-3-ethyl-cyclopentane	0.000501094
78-79-5	2-methyl-1,3-butadiene	0.000499289
590-19-2	1,2-butadiene	0.000490403
2870-04-4	1,3-dimethyl-2-ethyl-benzene	0.000481461
1072-05-5	2,6-dimethyl-heptane	0.000476217
14720-74-2	2,2,4-trimethyl-heptane	0.000467016
824-63-5	2-methyl-indan	0.000439344
1074-92-6	1-(1,1-dimethylethyl)-2-methyl-benzene	0.000426956
592-41-6	1-hexene	0.000423546
13269-52-8	trans-3-hexene	0.000422622
2213-23-2	2,4-dimethyl-heptane	0.000422147
105-05-5	1,4-diethyl-benzene	0.000390783
1120-21-4	n-undecane	0.000378441
110-62-3	pentanal	0.000376131
4050-45-7	trans-2-hexene	0.000355995
14686-14-7	trans-3-heptene	0.00035565
7642-04-8	cis-2-octene	0.000344011
1678-91-7	ethyl-cyclohexane	0.000318917
2207-01-4	cis-1,2-dimethyl-cyclohexane	0.000271176
1839-63-0	1,3,5-trimethyl-cyclohexane	0.000268792
15869-87-1	2,2-dimethyl-octane	0.000237057
7146-60-3	2,3-dimethyl-octane	0.000234718
563-78-0	2,3-dimethyl-1-butene	0.000231376
535-77-3	1-methyl-3-(1-methylethyl) benzene	0.000228013
4110-44-5	3,3-dimethyl-octane	0.000224977
538-93-2	(2-methyl-propyl) benzene	0.00022236
625-27-4	2-methyl-2-pentene	0.000221064
463-82-1	2,2-dimethyl-propane	0.000208707
760-20-3	3-methyl-1-pentene	0.000207391
16747-30-1	2,4,4-trimethyl-hexane	0.000207128
15869-89-3	2,5-dimethyl-octane	0.000200048
692-24-0	2-methyl-trans-3-hexene	0.000199602
3074-71-3	2,3-dimethyl-heptane	0.000180652
124-11-8	1-nonene	0.000168512
1640-89-7	ethylcyclo-pentane	0.000161199
2738-19-4	2-methyl-2-hexene	0.000156125
111-66-0	1-octene	0.000154377
7688-21-3	cis-2-hexene	0.000152575
674-76-0	4-methyl-trans-2-pentene	0.000147646
689-97-4	1-buten-3-yne	0.000137369
590-73-8	2,2-dimethyl-hexane	0.000125526
763-29-1	2-methyl-1-pentene	0.000124347
6443-92-1	cis-2-heptene	0.000120364
691-37-2	4-methyl-1-pentene	0.000116634
16747-26-5	2,2,4-trimethyl-hexane	0.000114231
135-98-8	(1-methyl-propyl) benzene	0.000111651
14850-23-8	trans-4-octene	0.000110369
1120-62-3	3-methyl-cyclopentene	0.000104472
6236-88-0	1-methyl-4-ethyl-cyclohexane	0.000103236
107-00-6	1-butyne	9.25532e-05
135-01-3	1,2-diethyl-benzene	8.68528e-05
592-76-7	1-heptene	8.66527e-05
560-21-4	2,3,3-trimethyl-pentane	8.65911e-05
464-06-2	2,2,3-trimethyl-butane	8.47673e-05
558-37-2	3,3-dimethyl-1-butene	8.42842e-05
616-12-6	3-methyl-trans-2-pentene	8.00602e-05
693-89-0	1-methyl-cyclopentene	7.4531e-05
99-87-6	1-methyl-4-(1-methylethyl) benzene	7.35496e-05
2051-30-1	2,6-dimethyl-octane	7.15307e-05
107-40-4	2,4,4-trimethyl-2-pentene	6.86095e-05
16021-20-8	1-ethyl-2-n-propyl-benzene	6.08539e-05
2004-70-8	trans-1,3-pentadiene	5.97573e-05
13389-42-9	trans-2-octene	5.96843e-05
14686-13-6	trans-2-heptene	5.89585e-05
10574-37-5	2,3-dimethyl-2-pentene	5.72033e-05
563-16-6	3,3-dimethyl-hexane	5.69252e-05
107-39-1	2,4,4-trimethyl-1-pentene	5.63071e-05
2213-32-3	2,4-dimethyl-1-pentene	4.90584e-05
3683-22-5	4-methyl-trans-2-hexene	4.52079e-05
7385-78-6	3,4-dimethyl-1-pentene	4.14052e-05
460-12-8	1,3-butadiyne	4.12311e-05
10574-36-4	3-methyl-cis-2-hexene	3.21055e-05
7642-09-3	cis-3-hexene	2.42751e-05
3221-61-2	2-methyl-octane	2.02113e-05
3899-36-3	3-methyl-trans-3-hexene	1.90901e-05
816-79-5	3-ethyl-2-pentene	1.61224e-05
3404-61-3	3-methyl-1-hexene	8.47651e-06
503-17-3	2-butyne	5.77414e-06
1634-04-4	methyl-tert-butyl-ether	0
637-92-3	1-ethyl-tert-butyl-ether	0
691-38-3	4-methyl-cis-2-pentene	0

## Sheet: Table S3c
VOC emission composition for gasoline source (hot operation)
CAS	Name	Mass fraction
71-43-2	benzene	0.0883503
108-88-3	toluene	0.0733881
107-83-5	2-methyl-pentane	0.0641659
74-85-1	ethene	0.0546653
75-28-5	methyl-propane	0.0511351
108-38-3	m-xylene	0.0420195
74-84-0	ethane	0.0392218
50-00-0	formaldehyde	0.0352211
115-07-1	propene	0.0335264
96-14-0	3-methyl-pentane	0.0326623
95-63-6	1,2,4-trimethyl-benzene	0.030131
95-47-6	o-xylene	0.0264653
1839-63-0	1,3,5-trimethyl-cyclohexane	0.0243751
111-65-9	n-octane	0.0238315
106-42-3	p-xylene	0.0215709
16747-30-1	2,4,4-trimethyl-hexane	0.020659
2532-58-3	cis-1,3-dimethyl-cyclopentane	0.0201233
592-41-6	1-hexene	0.0200147
589-81-1	3-methyl-heptane	0.0184701
527-53-7	1,2,3,5-tetramethyl-benzene	0.0183789
824-63-5	2-methyl-indan	0.0181645
287-92-3	cyclo-pentane	0.0163167
565-75-3	2,3,4-trimethyl-pentane	0.0150324
100-52-7	benzaldehyde	0.0133005
75-07-0	acetaldehyde	0.0128493
142-82-5	n-heptane	0.0124575
108-08-7	2,4-dimethyl-pentane	0.0111787
464-06-2	2,2,3-trimethyl-butane	0.0106653
7642-04-8	cis-2-octene	0.0106123
590-73-8	2,2-dimethyl-hexane	0.00999134
2213-23-2	2,4-dimethyl-heptane	0.00965821
2613-66-3	cis-1-methyl-3-ethyl-cyclopentane	0.00814708
589-53-7	4-methyl-heptane	0.00796643
2613-65-2	trans-1-methyl-3-ethyl-cyclopentane	0.0078915
96-37-7	methylcyclo-pentane	0.0078344
3404-61-3	3-methyl-1-hexene	0.00719467
74-86-2	ethyne	0.00698587
1758-88-9	1,4-dimethyl-2-ethyl-benzene	0.00670984
496-11-7	2,3-dihydro-indene	0.00657858
99-87-6	1-methyl-4-(1-methylethyl) benzene	0.00618667
926-82-9	3,5-dimethyl-heptane	0.00592565
535-77-3	1-methyl-3-(1-methylethyl) benzene	0.00588368
540-84-1	2,2,4-trimethyl-pentane	0.00578313
4032-94-4	2,4-dimethyl-octane	0.0048132
1074-17-5	1-methyl-2-n-propyl-benzene	0.00421385
141-93-5	1,3-diethyl-benzene	0.00412851
1678-91-7	ethyl-cyclohexane	0.00302722
67-64-1	acetone	0.00280259
2815-57-8	(1a,2a,3b)-1,2,3-trimethyl-cyclopentane	0.002568
463-49-0	1,2-propadiene	0.00256636
15869-89-3	2,5-dimethyl-octane	0.00252269
100-42-5	styrene	0.00194857
616-12-6	3-methyl-trans-2-pentene	0.00173562
106-99-0	1,3-butadiene	0.00128262
6236-88-0	1-methyl-4-ethyl-cyclohexane	0.00126339
16021-20-8	1-ethyl-2-n-propyl-benzene	0.00121691
1120-21-4	n-undecane	0.000986545
933-98-2	1,2-dimethyl-3-ethyl-benzene	0.000663197
1074-43-7	1-methyl-3-n-propyl-benzene	0.000452997
135-98-8	(1-methyl-propyl) benzene	0.000395385
620-14-4	1-methyl-3-ethyl-benzene	0.000374894
110-83-8	cyclo-hexene	0.000327168
591-76-4	2-methyl-hexane	0.000309917
590-35-2	2,2-dimethyl-pentane	0.000257643
66-25-1	hexanal	0.000166723
98-82-8	(1-methylethyl) benzene	0.000140577
2738-19-4	2-methyl-2-hexene	0.000107625
624-64-6	trans-2-butene	2.15507e-05
123-72-8	butanal	1.66303e-05
538-93-2	(2-methyl-propyl) benzene	0
1074-92-6	1-(1,1-dimethylethyl)-2-methyl-benzene	0
526-73-8	1,2,3-trimethyl-benzene	0
95-93-2	1,2,4,5-tetramethyl-benzene	0
2815-58-9	1,2,4-trimethyl-cyclopentane	0
590-19-2	1,2-butadiene	0
135-01-3	1,2-diethyl-benzene	0
934-80-5	1,2-dimethyl-4-ethyl-benzene	0
108-67-8	1,3,5-trimethyl-benzene	0
460-12-8	1,3-butadiyne	0
2870-04-4	1,3-dimethyl-2-ethyl-benzene	0
874-41-9	1,3-dimethyl-4-ethyl-benzene	0
934-74-7	1,3-dimethyl-5-ethyl-benzene	0
105-05-5	1,4-diethyl-benzene	0
689-97-4	1-buten-3-yne	0
106-98-9	1-butene	0
107-00-6	1-butyne	0
637-92-3	1-ethyl-tert-butyl-ether	0
592-76-7	1-heptene	0
527-84-4	1-methyl-2-(1-methylethyl) benzene	0
611-14-3	1-methyl-2-ethyl-benzene	0
622-96-8	1-methyl-4-ethyl-benzene	0
1074-55-1	1-methyl-4-n-propyl-benzene	0
693-89-0	1-methyl-cyclopentene	0
124-11-8	1-nonene	0
111-66-0	1-octene	0
109-67-1	1-pentene	0
74-99-7	1-propyne	0
14720-74-2	2,2,4-trimethyl-heptane	0
16747-26-5	2,2,4-trimethyl-hexane	0
20291-95-6	2,2,5-trimethyl-heptane	0
3522-94-9	2,2,5-trimethyl-hexane	0
75-83-2	2,2-dimethyl-butane	0
15869-87-1	2,2-dimethyl-octane	0
463-82-1	2,2-dimethyl-propane	0
560-21-4	2,3,3-trimethyl-pentane	0
1069-53-0	2,3,5-trimethyl-hexane	0
563-78-0	2,3-dimethyl-1-butene	0
10574-37-5	2,3-dimethyl-2-pentene	0
79-29-8	2,3-dimethyl-butane	0
3074-71-3	2,3-dimethyl-heptane	0
584-94-1	2,3-dimethyl-hexane	0
7146-60-3	2,3-dimethyl-octane	0
565-59-3	2,3-dimethyl-pentane	0
107-39-1	2,4,4-trimethyl-1-pentene	0
107-40-4	2,4,4-trimethyl-2-pentene	0
2213-32-3	2,4-dimethyl-1-pentene	0
625-65-0	2,4-dimethyl-2-pentene	0
589-43-5	2,4-dimethyl-hexane	0
592-13-2	2,5-dimethyl-hexane	0
1072-05-5	2,6-dimethyl-heptane	0
2051-30-1	2,6-dimethyl-octane	0
503-17-3	2-butyne	0
78-79-5	2-methyl-1,3-butadiene	0
563-46-2	2-methyl-1-butene	0
763-29-1	2-methyl-1-pentene	0
513-35-9	2-methyl-2-butene	0
625-27-4	2-methyl-2-pentene	0
78-78-4	2-methyl-butane	0
592-27-8	2-methyl-heptane	0
871-83-0	2-methyl-nonane	0
3221-61-2	2-methyl-octane	0
115-11-7	2-methyl-propene	0
692-24-0	2-methyl-trans-3-hexene	0
558-37-2	3,3-dimethyl-1-butene	0
563-16-6	3,3-dimethyl-hexane	0
4110-44-5	3,3-dimethyl-octane	0
562-49-2	3,3-dimethyl-pentane	0
7385-78-6	3,4-dimethyl-1-pentene	0
583-48-2	3,4-dimethyl-hexane	0
816-79-5	3-ethyl-2-pentene	0
617-78-7	3-ethylpentane	0
563-45-1	3-methyl-1-butene	0
760-20-3	3-methyl-1-pentene	0
10574-36-4	3-methyl-cis-2-hexene	0
922-62-3	3-methyl-cis-2-pentene	0
1120-62-3	3-methyl-cyclopentene	0
589-34-4	3-methyl-hexane	0
2216-33-3	3-methyl-octane	0
3899-36-3	3-methyl-trans-3-hexene	0
691-37-2	4-methyl-1-pentene	0
691-38-3	4-methyl-cis-2-pentene	0
2216-34-4	4-methyl-octane	0
3683-22-5	4-methyl-trans-2-hexene	0
674-76-0	4-methyl-trans-2-pentene	0
107-02-8	acrolein	0
2207-01-4	cis-1,2-dimethyl-cyclohexane	0
638-04-0	cis-1,3-dimethyl-cyclohexane	0
590-18-1	cis-2-butene	0
6443-92-1	cis-2-heptene	0
7688-21-3	cis-2-hexene	0
627-20-3	cis-2-pentene	0
7642-09-3	cis-3-hexene	0
4170-30-3	crotonaldehyde	0
110-82-7	cyclo-hexane	0
142-29-0	cyclo-pentene	0
100-41-4	ethyl-benzene	0
1640-89-7	ethylcyclo-pentane	0
78-85-3	methacrolein	0
108-87-2	methylcyclo-hexane	0
78-93-3	methylethyl-ketone	0
1634-04-4	methyl-tert-butyl-ether	0
106-97-8	n-butane	0
124-18-5	n-decane	0
110-54-3	n-hexane	0
111-84-2	n-nonane	0
109-66-0	n-pentane	0
103-65-1	n-propyl-benzene	0
110-62-3	pentanal	0
123-38-6	propanal	0
74-98-6	propane	0
822-50-4	trans-1,2-dimethyl-cyclopentane	0
2207-03-6	trans-1,3-dimethyl-cyclohexane	0
1759-58-6	trans-1,3-dimethyl-cyclopentane	0
2004-70-8	trans-1,3-pentadiene	0
2207-04-7	trans-1,4-dimethyl-cyclohexane	0
14686-13-6	trans-2-heptene	0
4050-45-7	trans-2-hexene	0
13389-42-9	trans-2-octene	0
646-04-8	trans-2-pentene	0
14686-14-7	trans-3-heptene	0
13269-52-8	trans-3-hexene	0
14850-23-8	trans-4-octene	0

## Sheet: Table S4d
VOC emission composition for gas-turbine engine (idle)
CAS	Name	Mass fraction
74-86-2	ethyne	0.339281
50-00-0	Formaldehyde	0.0935877
115-07-1	Propene	0.0826217
112-31-2	Decanal	0.0444218
75-07-0	Acetaldehyde	0.0324782
71-43-2	benzene	0.0275327
106-99-0	1,3-butadiene	0.0273309
106-98-9	1-butene	0.0230942
107-02-8	Acrolein (2-propenal)	0.0186187
107-22-2	Glyoxal	0.0138063
67-56-1	Methyl alcohol (methanol)	0.0137226
74-84-0	Ethane	0.013707
78-98-8	Methylglyoxal	0.0114267
142-29-0	Cyclo-pentene	0.0113335
1120-21-4	n-undecane	0.0111199
109-67-1	1-pentene	0.0108232
108-88-3	toluene	0.0100518
592-41-6	1-hexene	0.00962456
74-85-1	Ethene	0.00917359
74-99-7	1-Propyne	0.00858022
115-11-7	Iso-butene	0.00850901
4170-30-3	Crotonaldehyde	0.00785346
592-76-7	1-heptene	0.00729853
624-64-6	Trans-2-butene	0.00723919
78-79-5	2-methyl-1,3-butadiene	0.00664581
110-82-7	cyclo-hexane	0.00615924
107-83-5	2-methyl-pentane	0.0059575
526-73-8	1,2,3-trimethyl-benzene	0.00557774
105-05-5	1,4-diethyl-benzene	0.00554213
123-38-6	Propionaldehyde	0.00552707
108-95-2	Phenol (carbolic acid)	0.00551947
75-28-5	Iso-butane	0.00506743
95-63-6	1,2,4-trimethyl-benzene	0.00497249
135-98-8	Sec-butylbenzene	0.0046758
74-98-6	Propane	0.00443845
111-84-2	n-nonane	0.00428418
78-78-4	Iso-pentane	0.00403496
563-46-2	2-methyl-1-butene	0.00359586
100-52-7	Benzaldehyde	0.00357321
563-45-1	3-methyl-1-butene	0.00350092
25339-56-4	Heptene	0.00332993
78-85-3	2-methyl-2-propenal	0.0032615
691-37-2	4-methyl-1-pentene	0.00322797
95-93-2	1,2,4,5-tetramethyl-benzene	0.00322797
108-38-3	m-xylene	0.00313303
106-97-8	n-Butane	0.00294315
589-34-4	3-methyl-hexane	0.00290754
67-64-1	Acetone	0.00280535
103-65-1	n-propyl-benzene	0.00197001
620-14-4	3-ethyl-toluene	0.00187507
124-11-8	1-nonene	0.00187023
646-04-8	Trans-2-pentene	0.0018632
110-62-3	Valeraldehyde	0.00186263
110-54-3	n-hexane	0.0018276
110-83-8	cyclo-hexene	0.00172079
108-67-8	1,3,5-trimethyl-benzene	0.00170892
108-87-2	1-methyl-cyclohexane	0.00170892
611-14-3	2-ethyl-toluene	0.00149531
287-92-3	Cyclo-pentane	0.00149531
96-14-0	3-methyl-pentane	0.00148344
109-66-0	n-Pentane	0.0014241
872-05-9	1-decene	0.00140648
590-18-1	Cis-2-butene	0.0013885
96-37-7	1-methyl-cyclopentane	0.00132916
135-01-3	1,2-diethyl-benzene	0.00129356
763-29-1	2-methyl-1-pentene	0.00125796
141-93-5	1,3-diethyl-benzene	0.00121049
4050-45-7	Trans-2-hexene	0.00112741
104-51-8	1-butyl-benzene	0.00100874
627-20-3	Cis-2-pentene	0.000996872
100-42-5	styrene	0.000973137
496-11-7	indane	0.000937534
622-96-8	4-ethyl-toluene	0.000913799
123-72-8	Butyraldehyde or butanal	0.000904706
111-65-9	n-octane	0.000890064
10574-37-5	2,3-dimethyl-2-pentene	0.000890064
7642-09-3	Cis-3-hexene	0.000854462
592-27-8	2-methyl-heptane	0.000842594
591-76-4	2-methyl-hexane	0.000795124
590-19-2	1,2-butadiene	0.000759521
592-48-3	Trans-1,3-hexadiene	0.000747654
80-56-8	a-pinene	0.000735786
7688-21-3	Cis-2-hexene	0.000723919
513-35-9	2-methyl-2-butene	0.000712051
111-66-0	1-octene	0.000700184
142-82-5	n-heptane	0.000700184
589-81-1	3-methyl-heptane	0.000676449
589-53-7	4-methyl-heptane	0.000664581
565-75-3	2,3,4-trimethyl-pentane	0.000628979
95-47-6	o-xylene	0.000617111
591-49-1	1-methyl-cyclohexene	0.000617111
98-82-8	iso-propyl-benzene	0.000569641
106-42-3	p-xylene	0.000569641
100-41-4	ethyl-benzene	0.000462833
75-19-4	Cyclo-propane	0.000344158
79-29-8	2,3-dimethyl-butane	0.000332291
124-18-5	n-decane	0.000296688
625-27-4	2-methyl-2-pentene	0.000249218
590-86-3	Isovaleraldehyde	0.000243282
75-83-2	2,2-dimethyl-butane	0.000178013

## Sheet: Table S4e
VOC emission composition for diesel source (non-DPF)
CAS	Name	Mass fraction
50-00-0	formaldehyde	0.190516
74-85-1	ethene	0.131287
	UNK	0.0887623
75-07-0	acetaldehyde	0.0851353
763-29-1	2-methyl-1-pentene	0.0708283
115-07-1	propene	0.0486379
96-37-7	Methylcyclopentane	0.0446409
78-85-3	methacrolein	0.0291174
67-64-1	acetone	0.0253645
74-86-2	ethyne	0.0228253
107-02-8	acrolein	0.0215145
100-52-7	benzaldehyde	0.0121067
106-98-9	1-butene	0.0118091
1120-21-4	n-undecane	0.0113003
71-43-2	benzene	0.0110962
123-38-6	propanal	0.0106646
124-18-5	n-decane	0.0100748
106-99-0	1,3-butadiene	0.00873202
109-66-0	N-pentane	0.00782563
110-54-3	N-hexane	0.00766612
107-22-2	Glyoxal	0.0073935
123-72-8	butanal	0.0068386
108-88-3	toluene	0.00679963
540-84-1	2,2,4-trimethylpentane	0.00654192
108-38-3	m-xylene	0.00628432
108-08-7	2,4-dimethylpentane	0.0060776
115-11-7	2-methyl-propene	0.00589739
111-84-2	n-nonane	0.00507858
109-67-1	1-pentene	0.00506999
592-76-7	1-heptene	0.00380285
696-29-7	Isopropylcyclohexane	0.00376048
2216-33-3	3-methyloctane	0.00353982
100-41-4	ethyl-benzene	0.00326595
589-34-4	3-methylhexane	0.00325228
142-82-5	N-heptane	0.00312251
110-82-7	Cyclohexane	0.00300005
513-35-9	2-methyl-2-butene	0.00291548
108-87-2	Methylcyclohexane	0.00286853
78-93-3	methylethyl-ketone	0.0028353
616-12-6	3-methyl-trans-2-pentene	0.00276254
95-47-6	o-xylene	0.00274225
111-65-9	n-octane	0.0023022
105-05-5	1,4-diethylbenzene (para)	0.00226452
624-64-6	trans-2-butene	0.00207228
611-14-3	1-Methyl-2-ethylbenzene	0.00195515
565-59-3	2,3-dimethylpentane	0.0019484
591-76-4	2-methylhexane	0.00176243
527-53-7	1,2,3,5-tetramethylbenzene	0.0017205
141-93-5	1,3-diethylbenzene (meta)	0.00170593
79-29-8	2,3-dimethylbutane	0.00168528
110-62-3	pentanal	0.00160376
463-49-0	1,2-propadiene	0.00157202
25155-15-1	Isopropyltoluene	0.00155705
592-27-8	2-methylheptane	0.00154603
78-79-5	Isoprene (2-methyl-1,3-butadiene)	0.00152975
142-29-0	Cyclopentene	0.00151146
3522-94-9	2,2,5-trimethylhexane	0.00142159
563-46-2	2-methyl-1-butene	0.00141532
590-18-1	cis-2-butene	0.00140107
589-81-1	3-methylheptane	0.00135349
110-83-8	Cyclohexene	0.00127392
28729-54-6	Propyltoluene	0.00125259
526-73-8	1,2,3-trimethylbenzene	0.0012404
563-45-1	3-methyl-1-butene	0.00119024
620-14-4	1-Methyl-3-ethylbenzene (3-Ethyltoluene)	0.00116495
75-83-2	2,2-dimethylbutane	0.00106548
108-67-8	1,3,5-trimethylbenzene	0.00104532
74-84-0	ethane	0.000990347
622-96-8	1-Methyl-4-ethylbenzene (4-ethyltoluene)	0.000984128
107-83-5	2-methylpentane (isohexane)	0.000980939
287-92-3	Cyclopentane	0.00096242
4050-45-7	Trans-2-hexene	0.000908185
80-56-8	Alpha-pinene	0.000874869
95-93-2	1,2,4,5-tetramethylbenzene	0.000825046
565-75-3	2,3,4-trimethylpentane	0.000805802
78-78-4	2-methyl-butane	0.000791653
767-58-8	1-Methylindan	0.000705877
496-11-7	Indan	0.000700212
66-25-1	hexanal	0.000697103
103-65-1	N-propylbenzene	0.000639453
100-42-5	styrene	0.000552381
95-63-6	1,2,4-trimethylbenzene & t-butylbenzene	0.000523508
104-51-8	N-butylbenzene	0.000523049
7688-21-3	Cis-2-hexene	0.000518564
589-53-7	4-methylheptane	0.000445284
824-63-5	2-methylindan	0.000428208
592-48-3	1,3-hexadiene (trans)	0.000371216
98-82-8	Isopropylbenzene (cumene)	0.000313981
625-27-4	2-methyl-2-pentene	0.000309001
138-86-3	Dl-limonene (dipentene)	0.000297207
922-62-3	3-methyl-cis-2-pentene	0.000227492
584-94-1	2,3-dimethylhexane	0.00016783
10574-37-5	2,3-dimethyl-2-pentene	5.8815e-05
10061-02-6	Trans-1,3-dichloropropene	5.39753e-05
127-91-3	Beta-pinene	1.62063e-05
1072-05-5; 2040-96-2	2,6-dimethylheptane, propylcyclopentane	1.24439e-05
106-97-8	n-butane	0
4170-30-3	crotonaldehyde	0
590-19-2	1,2-butadiene	0
627-20-3	cis-2-pentene	0
646-04-8	trans-2-pentene	0
74-98-6	propane	0
74-99-7	1-propyne	0
75-28-5	methyl-propane	0
107-00-6	1-butyne	0
463-82-1	2,2-dimethyl-propane	0
503-17-3	2-butyne	0
689-97-4	1-buten-3-yne	0

## Sheet: Table S4f
VOC emission composition for diesel source (DPF)
CAS	Name	Mass fraction
	UNK	0.244299
75-07-0	acetaldehyde	0.225707
78-85-3	methacrolein	0.118275
74-85-1	ethene	0.0860468
78-93-3	methylethyl-ketone	0.0561558
74-98-6	propane	0.0520656
67-64-1	acetone	0.0396553
50-00-0	formaldehyde	0.0326946
74-84-0	ethane	0.0301997
115-11-7	2-methyl-propene	0.0192764
123-38-6	propanal	0.0174482
124-18-5	n-decane	0.0123095
71-43-2	benzene	0.0114851
115-07-1	propene	0.00893785
4170-30-3	crotonaldehyde	0.00760015
1120-21-4	n-undecane	0.00666225
123-72-8	butanal	0.00566758
66-25-1	hexanal	0.00530156
108-88-3	toluene	0.00316764
106-99-0	1,3-butadiene	0.00242705
100-52-7	benzaldehyde	0.00220101
78-78-4	2-methyl-butane	0.00212048
75-28-5	methyl-propane	0.00203357
106-97-8	n-butane	0.001762
111-84-2	n-nonane	0.0015244
108-38-3	m-xylene	0.000779215
106-98-9	1-butene	0.000759658
111-65-9	n-octane	0.000754035
100-41-4	ethyl-benzene	0.000678447
74-86-2	ethyne	0.000677368
95-47-6	o-xylene	0.000512759
463-49-0	1,2-propadiene	0.000334792
110-62-3	pentanal	0.00014345
109-67-1	1-pentene	0.000127798
624-64-6	trans-2-butene	0.000106502
107-02-8	acrolein	0.000102675
590-19-2	1,2-butadiene	0
689-97-4	1-buten-3-yne	0
107-00-6	1-butyne	0
74-99-7	1-propyne	0
463-82-1	2,2-dimethyl-propane	0
503-17-3	2-butyne	0
563-46-2	2-methyl-1-butene	0
563-45-1	3-methyl-1-butene	0
590-18-1	cis-2-butene	0
627-20-3	cis-2-pentene	0
100-42-5	styrene	0
646-04-8	trans-2-pentene	0
