# Supplementary material for: Comprehensive organic emission profiles for gasoline, diesel, and gas-turbine engines including intermediate and semi-volatile organic compound emissions
Source: Copernicus journal article supplement (doi:10.5194/acp-18-17637-2018), 2018-12-12
Supplement: Supplementary file 3 [file acp-18-17637-2018-supplement.zip › SI_Table_S7.xlsx]

## Sheet: Table S7a
Test ID	Vehicle name	Certification	Cycle	Non-volatile	-1	0	1	2	3	4	5	6	7	8	9	10	11		Total emission factor (VOC+IVOC+SVOC+LVOC+NV, mg/kg fuel)
1027837	LEV1-1	Tier I	Cold UC	0.00162842	0	0.000322905	0.00294445	0.00537659	0.00171233	0.00324785	0.0114967	0.0375306	0.104545	0.34316	0.28323	0.0897398	0.115066		1197.05
1027852	LEV2-4	ULEV; Tier II	Cold UC	0.00232542	0	0.00215385	0.0185773	0.0164705	0.00485581	0.00485509	0.00798129	0.0345454	0.0264062	0.266282	0.30345	0.124656	0.187441		249.779
1027863	LEV2-13	LEV II, ULEV; Tier II, Bin 5	Cold UC	0.00413893	0	0.00205929	0.0201019	0.0258053	0.0140916	0.00934631	0.015124	0.0726611	0.136798	0.250371	0.206057	0.101977	0.141469		270.998
1027867	LEV2-9	LEV II, ULEV; Tier II, Bin 5	Cold UC	0.00165606	0	0.00114408	0.00933297	0.0143948	0.004733	0.00316237	0.00620849	0.0247188	0.0550511	0.180129	0.389159	0.211024	0.0992858		273.524
1027872	PreLEV-14	Pre-LEV	Cold UC	0.000708387	0.000786646	0.000547373	0.00126227	0.000992199	0.00105175	0.00202575	0.00508024	0.0154994	0.0604637	0.388894	0.291441	0.0796707	0.151577		6711.28
1027905	LEV2-19	LEV II, ULEV; Tier II, Bin 5	Cold UC	0.00191559	0	0.00192762	0.00918345	0.00712684	0.00356574	0.00651328	0.0119375	0.033422	0.0650964	0.265269	0.303474	0.128182	0.162386		257.968
1027907	LEV2-20	LEV II, ULEV	Cold UC	0.00181314	0.000245002	0.00220171	0.00844162	0.00763396	0.00505617	0.00413922	0.00876043	0.0332581	0.10387	0.333345	0.324761	0.130977	0.0354965		391.18
1027918	LEV1-6	LEV I, NLEV	Cold UC	0.00228163	0.00544269	0.00503654	0.00867284	0.00521652	0.00462397	0.00712799	0.0177377	0.0338969	0.0744247	0.258073	0.312597	0.118381	0.146488		7924.92
1027921	PreLEV-11	Pre-LEV	Cold UC	0.0021331	0.000103821	0.00100877	0.00485443	0.00490322	0.00471238	0.00575823	0.015503	0.0451986	0.072506	0.231865	0.311065	0.137789	0.162599		2869.34
1027970	LEV1-26	LEV I, ULEV	Cold UC	0.0035186	4.57607e-05	0.00137878	0.0092735	0.00900434	0.00916375	0.00755662	0.0199346	0.0789735	0.0964159	0.276639	0.27757	0.110068	0.100458		422.244
1027971	LEV2-4	ULEV; Tier II	Cold UC	0.00378777	0	0.000683009	0.00451103	0.00693359	0.00984036	0.00638953	0.0166031	0.100723	0.0562523	0.244361	0.264108	0.117562	0.168246		374.203
1027973	LEV2-11	LEV II, ULEV; Tier II, Bin 5	Cold UC	0.0010534	0.000689752	0.000972918	0.0030339	0.00256821	0.00224136	0.0015686	0.00432769	0.0251131	0.0606363	0.294357	0.396121	0.0596043	0.147712		3214.58
1028021	LEV2-18	Tier II	Cold UC	0.00225857	4.28948e-05	0.00112902	0.0100553	0.0095572	0.00441387	0.00468115	0.0132094	0.0437794	0.111393	0.294816	0.281955	0.150127	0.0725825		482.939
1028023	LEV1-25	LEV I; Tier I	Cold UC	0.00277297	0.00825292	0.0101963	0.012405	0.00564936	0.0100664	0.0073196	0.0130783	0.0396848	0.0624576	0.306084	0.278146	0.122877	0.12101		1496.49
1028027	LEV1-16	LEV I, TLEV	Cold UC	0.00321852	0	0.000683078	0.00461849	0.00421252	0.00381206	0.0050716	0.020003	0.0853884	0.0937643	0.269157	0.271891	0.124836	0.113344		1204.86
1028029	PreLEV-10	Pre-LEV	Cold UC	0.00105142	4.43844e-06	9.00476e-05	0.000484348	0.000538381	0.00107366	0.00154302	0.00679789	0.0299074	0.0891777	0.299053	0.299552	0.10369	0.167036		4388.75
1028075	LEV1-19	LEV I	Cold UC	0.00194147	2.16833e-05	0.000525228	0.00312173	0.00328793	0.00354897	0.00365854	0.0132961	0.0472116	0.0778174	0.293955	0.337219	0.106244	0.108151		869.399
1032302	LEV1-2	LEV	Cold UC	0.000993942	0.00041383	0.00054214	0.00603153	0.00764326	0.00239026	0.00217112	0.00353885	0.0154975	0.0789177	0.293231	0.333571	0.112677	0.142381		1174.72
1032304	LEV1-2	LEV	Cold UC	0.000500407	9.0016e-05	0.000263556	0.00214563	0.00142638	0.00131211	0.00116447	0.00214122	0.0107031	0.0757793	0.303732	0.336229	0.116018	0.148495		1406.21
1032309	LEV2-6	LEV II, ULEV	Cold UC	0.00149326	0.000152303	0.00064724	0.00795751	0.00917889	0.00325173	0.00350498	0.00716594	0.0255744	0.073904	0.277483	0.287782	0.121697	0.180207		571.216
1032320	PreLEV-5	LEV	Cold UC	0.000885352	0.000670339	0.000436581	0.00281528	0.0022095	0.00146432	0.0020116	0.00450088	0.0199435	0.0812467	0.281398	0.308193	0.141464	0.152761		2358.85
1032321	LEV2-6	LEV II, ULEV	Cold UC	0.00124908	0.000746679	0.000432704	0.00229743	0.00241598	0.00230976	0.00277853	0.00651625	0.0305441	0.0895893	0.299682	0.248253	0.134226	0.17896		709.748
1032342	LEV2-5	ULEV	Cold UC	0.00333529	0.00418398	0.00225221	0.0133676	0.0192928	0.00924132	0.00966566	0.0183326	0.0519444	0.0862101	0.291062	0.267085	0.0993002	0.124727		438.456
1032347	LEV1-3	LEV	Arterial	0.00312284	0.0072439	0.00252439	0.0092381	0.00793671	0.00857041	0.0115852	0.0203228	0.0526878	0.199558	0.234783	0.283334	0.0872047	0.0718878		54.6884
1032348	LEV1-3	LEV	Freeway	0.0113031	0.0209409	0.0116686	0.0350943	0.0272499	0.0304489	0.0449667	0.0834727	0.180894	0.0691127	0.190808	0.18471	0.0542511	0.0550786		90.3541
1032360	LEV2-3	LEV2O	Hot UC	0.00890338	0.0142912	0.00549218	0.0371318	0.0419054	0.0270459	0.0296629	0.0441185	0.14279	0.0527245	0.214585	0.224929	0.063389	0.0930314		100.944
1032383	LEV2-24	ULEV	Cold UC	0.00324982	0.00570925	0.00418588	0.0255244	0.0222326	0.0190811	0.0113164	0.0150626	0.021881	0.0964758	0.243624	0.228635	0.159952	0.14307		429.829
1032388	LEV1-21	LEV	Cold UC	0.00118672	0.0022111	0.00250508	0.00688078	0.00342304	0.00271596	0.00331411	0.00526667	0.0193264	0.0880503	0.300516	0.305276	0.106157	0.153171		931.156
1032392	PreLEV-4	Tier I	Cold UC	0.0013153	0.0010746	0.000967137	0.00345133	0.00234014	0.00173397	0.00269915	0.00655889	0.0317634	0.0926024	0.304724	0.311941	0.103541	0.135288		6008.18
1032393	LEV1-4	TLEV	Cold UC	0.000567566	0.000498217	0.00049142	0.00332164	0.00368552	0.00231807	0.00330713	0.0035383	0.00466917	0.0658546	0.246726	0.283774	0.270103	0.111146		875.387
1032426	PreLEV-3	Tier I	Hot UC	0.00123097	0.000103333	0.000339045	0.0017972	0.00202615	0.00247265	0.00259469	0.00675752	0.0312545	0.0651454	0.294838	0.397397	0.0803882	0.113656		2547.09
1032442	PreLEV-1	Tier I	Cold UC	0.00226879	0.00245692	0.00336916	0.0292586	0.0234947	0.00188413	0.0023177	0.00513178	0.0193483	0.0750345	0.271856	0.304769	0.0988004	0.16001		9133.16
1032443	PreLEV-9	Tier I	Cold UC	0.00105278	0.000825456	0.000608206	0.00339509	0.00238922	0.00163495	0.00256181	0.00616258	0.0229143	0.146022	0.335941	0.252885	0.106407	0.117201		4691.83
1032444	PreLEV-2	Tier I	Cold UC	0.000959409	0.00128289	0.00069126	0.0014616	0.00116509	0.00121521	0.00234257	0.00758717	0.0211546	0.0897742	0.291986	0.317343	0.132332	0.130705		28711.6
1032445	PreLEV-15	Tier I	Cold UC	0.00143484	0.00188801	0.00101978	0.00187091	0.00220799	0.00222393	0.00329261	0.00979021	0.0328928	0.0921107	0.283502	0.296956	0.111203	0.159607		13220.5
1032472	LEV1-24	LEV	Cold UC	0.00113025	0.00281667	0.00141887	0.00306531	0.00294405	0.00297966	0.00257972	0.00522372	0.0224433	0.0951537	0.300784	0.302598	0.101893	0.15497		1207.25
1032431	SORE4S-1.2			0.00121854	0.00130087	0.00121091	0.0017826	0.00407084	0.00536969	0.00454682	0.00543266	0.0231524	0.0571504	0.208683	0.206668	0.159461	0.319952		1406.46
1032439	SORE2S-2.2			0.00176261	0.00728106	0.0070171	0.0115196	0.0052563	0.00340179	0.00297263	0.003877	0.0264672	0.0918267	0.316433	0.388595	0.0897831	0.0438074		119452
1032463	SORE4S-2.1			0.00169899	0.00287463	0.00250148	0.00399315	0.00274525	0.00335881	0.00470566	0.00634033	0.0388266	0.0780748	0.22666	0.244437	0.141158	0.242625		20740.4
1032464	SORE4S-2.2			0.00167537	0.0029317	0.00261879	0.00404365	0.00260337	0.00336958	0.00422849	0.00596429	0.0386776	0.0713932	0.213187	0.233717	0.162212	0.253379		20570

## Sheet: Table S7b
Test	Non-volatile	-1	0	1	2	3	4	5	6	7	8	9	10	11		Total emission factor (VOC+IVOC+SVOC+LVOC+NV, mg/kg fuel)
4% load	0.00109533	0.00521178	0.01101	0.0162551	0.00879728	0.00858622	0.0195348	0.0462125	0.198147	0.0349579	0.0776884	0.132911	0.209386	0.230207		13256.3
85% load	0.0564502	0.0184763	0.0109833	0.0156434	0.018957	0.0298444	0.0334465	0.0413863	0.0904593	0.0752092	0.104446	0.192397	0.233367	0.0789336		1527.87

## Sheet: Table S7c
Test ID	Vehicle ID	After-treatment	Cycle	Non-volatile	-1	0	1	2	3	4	5	6	7	8	9	10	11		Total emission factor (VOC+IVOC+SVOC+LVOC+NV, mg/kg fuel)
1406	2	DOC + DPF + SCR	UDDS2	0.00580084	0.000613451	0.000634048	0.366219	0.053298	0.00773385	0.0342294	0.0679081	0.0494484	0.000991968	0	0.390368	0.0210573	0.00169813		237.197
1411	2	DOC + DPF + SCR	UDDS2	0.00694425	0.00102815	0.00164922	0.0602966	0.0397161	0.0374908	0.145914	0.23054	0.177791	0	0.0119799	0.255576	0.0190499	0.0120241		52.6898
1413	2	DOC + DPF + SCR	UDDS2	0.00721148	0.000937678	0.00258811	0.0838155	0.0833802	0.0608412	0.151389	0.20374	0.134456	0	0.0120355	0.23001	0.0218047	0.00779083		34.7398
1417	2	DOC + DPF + SCR	UDDS2	0.00601789	0.000782481	0.00215974	0.069943	0.0695798	0.0507712	0.126332	0.170018	0.112202	0.122283	0.00200727	0.21249	0.0241768	0.0312354		41.4841
1418	2	DOC + DPF + SCR	UDDS2	0.00736362	0.000517236	0.00125761	0.133927	0.0833495	0.0303339	0.129965	0.203995	0.153017	0.00364242	0	0.224097	0.0177418	0.0107931		49.6197
1419	2	DOC + DPF + SCR	CREEP3IDLE30	0.00461455	4.11432e-05	0.000109531	0.00840351	0.00744876	0.00582024	0.0101519	0.166264	0.263216	0.218311	0.134201	0.0435893	0.0458773	0.0919524		2428.33
1420	2	DOC + DPF + SCR	CREEP3IDLE30	0.00369382	3.2934e-05	8.76762e-05	0.00672678	0.00596253	0.00465894	0.00812628	0.13309	0.210697	0.333359	0.117621	0.0447993	0.0513552	0.0797907		3025.36
1433	3	none	UDDS2	0.0049367	0.00213372	0.00463915	0.0162766	0.0163315	0.0362717	0.0970383	0.180442	0.140537	0.0957357	0.0475767	0.121348	0.164126	0.0726072		1322.42
1434	3	none	CREEP3IDLE30	0.00655964	0.0093645	0.00827173	0.0207844	0.0166235	0.0345896	0.118383	0.222157	0.225791	0.141066	0.0536818	0.0281714	0.0464382	0.0681187		5212.94
1435	3	none	HHDDT50MPH3	0.00552843	0.00344999	0.00430368	0.0143794	0.0217843	0.0459872	0.109787	0.164098	0.189053	0.0914527	0.0517105	0.121276	0.122168	0.0550212		1373.43
1437	3	none	HHDDT50MPH3	0.00575488	0.00437036	0.00564121	0.0157571	0.0243765	0.0543807	0.125271	0.177799	0.167892	0.0768344	0.0482524	0.115709	0.121795	0.0561655		1326.31
1439	3	none	CREEP3IDLE30	0.0077626	0.00689291	0.00565085	0.0156392	0.017937	0.0433363	0.146241	0.294659	0.245904	0.0808874	0.0415789	0.0202322	0.0238599	0.0494195		7502.68
1440	3	none	HHDDT50MPH3	0.00623827	0.00345813	0.00408838	0.0127012	0.0276514	0.0650493	0.145708	0.215587	0.149584	0.0724042	0.029003	0.0988778	0.116968	0.0526817		1409.18
1441	3	none	UDDS2	0.0060202	0.00193891	0.00312722	0.0109921	0.0136048	0.0368332	0.109185	0.204153	0.222186	0.0855028	0.0242442	0.0984416	0.118912	0.0648596		1598.32
1443	3	none	CREEP3IDLE30	0.00606851	0.00686443	0.00524159	0.0141075	0.0108566	0.0554408	0.177694	0.184439	0.152206	0.136111	0.0556452	0.0423617	0.0531319	0.0998305		6161.87
1444	3	none	HHDDT50MPH3	0.00590801	0.0310922	0.0237416	0.0638995	0.0491748	0.0638847	0.140315	0.121249	0.0974438	0.0700292	0.0537389	0.104065	0.116308	0.0591502		1359.75
1444	3	none	HHDDT50MPH3	0.0053037	0.00395103	0.00545813	0.0168008	0.0172655	0.0735532	0.161551	0.1396	0.112191	0.0806276	0.0618719	0.119814	0.133911	0.0681021		1178.91
1445	3	none	UDDS2	0.005167	0.00373861	0.00467442	0.0139155	0.0123867	0.0506011	0.14333	0.148054	0.14	0.0758541	0.0735703	0.12173	0.131934	0.0750442		1320.86
1450	1	DOC + DPF	CREEP3IDLE30	0.00396846	0.000900432	0.00245085	0.0341239	0.0247834	0.0240843	0.0643397	0.0954905	0.150673	0.117575	0.0295128	0.113557	0.0402515	0.298289		317.113
1458	1	DOC + DPF	UDDS2	0.00259724	4.57115e-05	0.000292399	0.0711065	0.014493	0.021468	0.0467275	0.0467885	0.0588021	0.300269	0.0417502	0.337552	0.0466068	0.0115004		95.6635
1461	1	DOC + DPF	UDDS2	0.00398419	7.01219e-05	0.000448542	0.109078	0.0222324	0.0329322	0.0716805	0.0717741	0.090203	0.00699461	0.0338006	0.466079	0.0887692	0.00195352		62.6192
1028019	4	DOC	Cold UC	0.00705638	0.00110623	0.00138522	0.0089453	0.0104687	0.0370167	0.153741	0.253882	0.239092	0.127579	0.0937048	0.0616353	0.00374684	0.000640421		1161.06
1032421	TRU			0.0288153	0.0143547	0.0121464	0.0469233	0.0359937	0.0580545	0.127522	0.125312	0.300075	0.104096	0.0488409	0.0257552	0.0308541	0.0412576		1236.64
1032422	TRU			0.0290727	0.0144829	0.0122549	0.0473424	0.0363152	0.0585731	0.128662	0.126431	0.302755	0.099736	0.0496953	0.0255824	0.0266554	0.042442		1225.69
